# Supplementary material for: Three-dimensional spatio-angular fluorescence microscopy with a polarized dual-view inverted selective-plane illumination microscope (pol-diSPIM)
Source: PubMed Central journal article supplement (PMC11071302; doi:10.1101/2024.03.09.584243), 2024-03-12
Supplement: media-1.pdf [file media-1.pdf]

1 **Supplement:** Three-dimensional spatio-angular  
2 fluorescence microscopy with a polarized  
3 dual-view inverted selective-plane illumination  
4 microscope (pol-diSPIM)

5 Talon Chandler<sup>1,2\*†</sup>, Min Guo<sup>3,4\*†</sup>, Yijun Su<sup>4,5,6</sup>, Jiji Chen<sup>5</sup>,  
6 Yicong Wu<sup>4</sup>, Junyu Liu<sup>3</sup>, Atharva Agashe<sup>7</sup>, Robert S. Fischer<sup>8</sup>,  
7 Shalin B. Mehta<sup>1,2,9</sup>, Abhishek Kumar<sup>9</sup>, Tobias I. Baskin<sup>10,11</sup>,  
8 Valentin Jamouille<sup>8,12</sup>, Huafeng Liu<sup>3</sup>, Vinay Swaminathan<sup>13,14</sup>,  
9 Amrinder Nain<sup>7,15</sup>, Rudolf Oldenbourg<sup>9</sup>, Patrick La Rivière<sup>2,11</sup>,  
10 Hari Shroff<sup>4,5,6,11</sup>

11 <sup>1</sup>CZ Biohub SF, San Francisco, 94158, California, USA.

12 <sup>2</sup>Department of Radiology, University of Chicago, Chicago, 60637,  
13 Illinois, USA.

14 <sup>3</sup>State Key Laboratory of Extreme Photonics and Instrumentation,  
15 College of Optical Science and Engineering, Zhejiang University,  
16 Hangzhou, 310027, Zhejiang, China.

17 <sup>4</sup>Laboratory of High Resolution Optical Imaging, National Institute of  
18 Biomedical Imaging and Bioengineering, National Institutes of Health,  
19 Bethesda, 20892, Maryland, USA.

20 <sup>5</sup>Advanced Imaging and Microscopy Resource, National Institutes of  
21 Health, Bethesda, 20892, Maryland, USA.

22 <sup>6</sup>Janelia Research Campus, Howard Hughes Medical Institute, Ashburn,  
23 20147, Virginia, USA.

24 <sup>7</sup>Department of Mechanical Engineering, Virginia Tech, Blacksburg,  
25 24061, Virginia, USA.

26 <sup>8</sup>Cell Biology and Physiology Center, National Heart, Lung, and Blood  
27 Institute, National Institutes of Health, Bethesda, 20892, Maryland,  
28 USA.

29 <sup>9</sup>Bell Center, Marine Biological Laboratory, Woods Hole, 02543,  
30 Massachusetts, USA.

- 31 <sup>10</sup>Biology Department, University of Massachusetts, Amherst, 01003,  
32 Maryland, USA.
- 33 <sup>11</sup>Whitman Center, Marine Biological Laboratory, Woods Hole, 02543,  
34 Massachusetts, USA.
- 35 <sup>12</sup>Department of Molecular Biology and Biochemistry, Simon Fraser  
36 University, Burnaby, V5A 1S6, British Columbia, Canada.
- 37 <sup>13</sup>Department of Clinical Sciences, Lund University, Lund, SE-221 00,  
38 Scania, Sweden.
- 39 <sup>14</sup>Wallenberg Centre for Molecular Medicine, Lund University, Lund,  
40 SE-221 00, Scania, Sweden.
- 41 <sup>15</sup>Department of Biomedical Engineering and Mechanics, Virginia Tech,  
42 Blacksburg, 24061, Virginia, USA.

43 \*Corresponding author(s). E-mail(s): [talon.chandler@czbiohub.org](mailto:talon.chandler@czbiohub.org);  
44 [guom@zju.edu.cn](mailto:guom@zju.edu.cn);

45 †These authors contributed equally to this work.

## 46 1 Instrumentation

### 47 1.1 Core components

48 The pol-diSPIM system, shown in **Figure S1(a)**, is built on an asymmetric diSPIM  
49 frame [1] equipped with a pair of water-immersion objectives: a 25 $\times$ , 1.1 NA lens  
50 (Nikon, MRD77220,  $f = 8$  mm), and a 28.6 $\times$ , 0.67 NA lens (Special Optics, 54-10-  
51 7@488-910nm,  $f = 7$  mm). We mounted our samples on glass coverslips (24  $\times$  60  
52 mm, #1.5, Electron Microscopy Sciences, 63793-01) and placed the coverslips in an  
53 imaging chamber (Applied Scientific Instrumentation, I-3078-2460). We mounted the  
54 imaging chamber to an XY piezo stage (Physik Instrumente, P-545.2C7, 200  $\mu\text{m}$   $\times$   
55 200  $\mu\text{m}$ ) that we bolted to a motorized XY stage (Applied Scientific Instrumentation,  
56 RAMM and MS-2500). We used the motorized stage for coarse sample positioning  
57 before imaging, and we used the piezo stage to step our samples through stationary  
58 light sheets to create imaging volumes.

### 59 1.2 Excitation optics

60 To excite the sample, we combined 488 nm, 561 nm, and 640 nm lasers (Coherent,  
61 OBIS models 1277611, 1280720 and 1185055) with two dichroic mirrors (Semrock,  
62 Di02-R488-25x36 and Di01-R488/561-25x36), passed the combined beam through an  
63 acousto-optic tunable filter (AOTF, Quanta Tech, AOTFnC-400.650-TN) for power  
64 and shuttering control, split the beam into two paths with a 50/50 beam splitter

65 (Chroma, 21014), then guided these two beams to our excitation arms with single-  
66 mode and polarization-preserving fibers (Excelitas Technologies, kineFLEX Fiber  
67 Delivery System, 012486). In each arm, we used a pair of MEMS mirrors (Applied  
68 Scientific Instrumentation, anti-stripping fiber-coupled laser scanner) to scan and tilt  
69 the laser beam, **Figure S1(b)**. We used the first MEMS mirror, slightly offset from  
70 a conjugate image plane to avoid potential burning of the mirror by a concentrated  
71 focus, to tilt the beam in the plane of the sample; and we used the second MEMS  
72 mirror, conjugate to the back focal plane of each objective, to scan the beam to create  
73 a virtual light sheet in the plane of the sample. See **Figure S2(e, f)** to see how these  
74 mirrors affect the light sheet in sample space.

75 To modulate the excitation polarization, we placed a liquid crystal (LC) module in  
76 each arm between a 300 mm tube lens (for excitation path, Applied Scientific Instru-  
77 mentation, C60-TUBE-E-300) and the objective. Each LC module, **Figure S1(c)**,  
78 contains a wire-grid linear polarizer followed by two stacked liquid crystal variable  
79 retarders (LCVRs, Meadowlark Optics, LVR-200) assembled in a custom acrylic hous-  
80 ing with the first LCVR's slow axis oriented at 45 degrees relative to the linear  
81 polarizer's transmission axis and the second LCVR's slow axis parallel to the linear  
82 polarizer's transmission axis [2]. The linear polarizer ensures that the beam reaching  
83 the LCVRs is polarized with a high purity and fixed orientation, and the LCVR's ori-  
84 entations are chosen so that varying their voltages allows us to illuminate our sample  
85 with any polarization state perpendicular to the direction of the beam propagation.  
86 We used a four-channel LC digital controller (Meadowlark Optics, D3050) to apply  
87 voltages to both LCVRs on both illumination arms.

88 We achieved additional polarization modulation by tilting the beam with MEMS  
89 mirror 1, see **Figure S1(b)**. Tilting the illumination beam changes the beam's prop-  
90 agation direction and the polarization states that are accessible via the LCVRs, so we  
91 varied the first MEMS mirrors and the LCVRs together to explore a large set of pos-  
92 sible illumination polarizations. We describe our specific polarization samples in more  
93 detail in **Supplement 2**.

### 94 1.3 Detection optics

95 For each arm, we collected fluorescent emissions with an objective, blocked reflections  
96 and background with dichroic mirrors (Semrock, Di03-R405/488/561/635-t1-25x36)  
97 and a quad-notch filter (Semrock, NF03-405/488/561/635E-25), and imaged with  
98 a tube lens (400 mm tube lens for the 1.1 NA detection path, Applied Scientific  
99 Instrumentation, C60-TUBE-400, and 200 mm tube lens for the 0.67 NA detection  
100 path, Applied Scientific Instrumentation, C60-TUBE-B) onto sCMOS cameras (Hama-  
101 matsu, ORCA Flash 4.0 v2). The effective magnifications for the 1.1 NA and 0.67 NA  
102 detection paths are  $50\times$  and  $28.6\times$ , respectively, so the resulting object-space pixel  
103 sizes are  $6.5\ \mu\text{m}/50 = 130\ \text{nm}$ , and  $6.5\ \mu\text{m}/28.6 = 227\ \text{nm}$ .

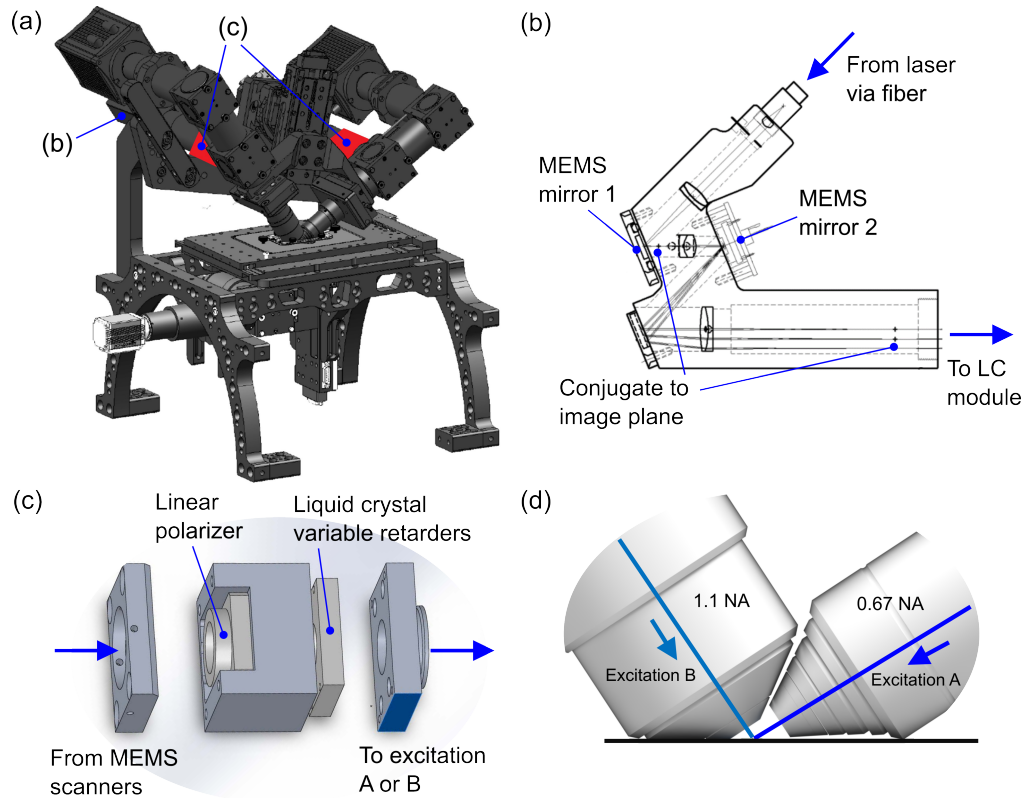

**Fig. S1 Key hardware and schematics for polarized dual-view inverted selective plane illumination microscope (pol-diSPIM).** (a) Overview of the microscope with the MEMS scanners detailed in (b) and the liquid crystal (LC) modules (red box in each arm) detailed in (c). (b) Schematic of the MEMS scanner module (Applied Scientific Instrumentation). The beam arrives from a fiber-coupled laser; reflects from MEMS mirror 1, positioned slightly offset from the position conjugate to the image plane for tilting the beam; reflects from MEMS mirror 2, positioned conjugate to the back focal plane of the objective for scanning the beam to create a light sheet; then continues to the tube lens and an LC module. (c) Exploded drawing of an LC module. The beam arrives from the MEMS scanner where it is linearly polarized before its polarization is modulated by a stacked pair of liquid-crystal variable retarders (LCVRs). The beam continues to excitation objective A or B where it forms a polarization- and tilt-controlled light sheet in the sample. (d) A view of the asymmetric objective pair (1.1 NA and 0.67 NA) with arrows indicating the excitation beams' propagation directions.

## 104 2 Degrees of freedom & finite sampling

105 The pol-diSPIM system has three degrees of freedom that allow it to acquire data  
 106 that can be used to estimate the orientation of the molecules it images: its transverse  
 107 illumination polarizations, its illumination tilt angles, and its views.

## 108 2.1 Transverse illumination polarization

109 We modulate the illumination beam’s transverse polarization with a liquid crystal  
110 (LC) module **Figure S1(c)**, which allows us to illuminate with arbitrary transverse  
111 polarizations. Although the LC module is capable of generating any transverse polar-  
112 ization state, we restrict our samples to six linear polarization states in each arm for  
113 the following reasons:

- 114 1. We restrict our illumination polarization states to **linear polarizations only**. The  
115 large majority of fluorescent emitters used in biological applications are excited via  
116 a linear dipole moment, so they are excited most efficiently by linearly polarized  
117 light. Illuminating the sample with elliptically polarized light would reduce contrast.
- 118 2. We restrict our linear polarization states to just **six states at 0°, 45°, 60°, 90°,  
119 120°, and 135°** with respect to the  $y$ -axis (see **Figure S3(a, b)** for angle con-  
120 ventions). We know that dipoles are excited proportional to  $\cos^2\theta$  where  $\theta$  is the  
121 angle between the illumination polarization and the excitation dipole moment, so  
122 an arbitrary ensemble of dipoles is excited with a functional dependence of the form  
123  $a \cos^2(\theta - \phi) + b$ , where  $a$ ,  $b$ , and  $\phi$  are unknowns. Three noise-free samples at differ-  
124 ent values of  $\theta$  are sufficient to recover  $a$ ,  $b$ , and  $\phi$ , but in practice we often operate  
125 in a noise-limited regime where some degree of oversampling is beneficial. There-  
126 fore, we chose to illuminate our sample with as many as six transverse polarization  
127 states.

## 128 2.2 Illumination tilt angles

129 We modulate the tilt of the illumination beams with the MEMS mirror 1 in either  
130 arm. The MEMS mirrors allow us to tilt both illumination beams up to  $\sim 10^\circ$  in any  
131 direction, but we restrict our samples to three tilt angles in the plane of the light  
132 sheet, see **Figure S2(e, f)** for the orientation of the tilt, for the following reasons:

- 133 1. We restrict our tilt samples to just **three tilt angles** because only three samples  
134 are required to recover  $a$ ,  $b$ , and  $\phi$  from an  $a \cos^2(\theta - \phi) + b$  signal. Unlike the 6-  
135 sample oversampling for the transverse polarization states, tilt angles beyond  $\sim 10^\circ$   
136 are unavailable to the MEMS mirrors, so the benefits of oversampling are small.
- 137 2. We restricted our tilt samples to tilts **in the plane of the light sheet** so that  
138 the light sheet remains in the focal plane of the fixed perpendicular imaging arm.
- 139 3. We chose our tilt samples **at the nominal untilted angle (labelled 0), and at  
140 the maximum tilt angles in either direction (labelled  $\pm 1$ )** that did not create  
141 noticeably aberrated images. These tilt angles maximize the contrast available to  
142 the imaging system.

## 143 2.3 Views

144 The pol-diSPIM employs an asymmetric two-arm geometry with a 1.1 NA objective  
145 and a 0.67 NA objective (**Figure S2**). Similar to conventional diSPIM [3, 4], one  
146 objective generates light-sheet illumination while the other objective collects the flu-  
147 orescence (e.g., view A: 0.67 NA excitation, 1.1 NA detection, **Figure S2(a)**), and

148 after an acquisition the roles of the two objectives are switched (e.g., view B: 1.1 NA  
149 excitation, 0.67 NA detection, **Figure S2(b)**).

150 While these two views are primarily for improving axial spatial resolution, they also  
151 provide additional orientation information. For example, a dipole oriented parallel to  
152 the 1.1 NA objective’s optical axis will emit more light in the direction of the 0.67 NA  
153 view, so, all else equal, a larger signal in the 0.67 NA objective will lead us to estimate  
154 that a dipole is oriented closer to parallel with the optical axis of the 1.1 NA objective.

## 155 2.4 Finite sampling and notation

156 We reduced a large set of possible samples down to a set of **36 possible configurations**—all combinations of 6 transverse polarizations  $p \in$   
157  $\{0^\circ, 45^\circ, 60^\circ, 90^\circ, 120^\circ, 135^\circ\}$ , 3 tilt angles  $\mathbf{t} \in \{-1, 0, +1\}$ , and 2 views  $\mathbf{v} \in \{A, B\}$ .  
158 See **Figure S3(c, d)** for an overview of all 36 configurations.

159 We can describe a single volumetric acquisition with a tuple  $(p, \mathbf{t}, \mathbf{v})$  describing its  
160 polarization, tilt, and view. For example,  $(45^\circ, 0, A)$  refers to the volumetric sample  
161 acquired under polarized illumination  $45^\circ$  from the  $\hat{\mathbf{y}}$ -axis with no tilt from view  $A$ .  
162 In **Supplement 5** we will find it convenient to combine the  $p$  and  $\mathbf{t}$  indices into a  
163 single index  $j$ .  
164

## 165 2.5 Excitation sampling schemes

166 We proceeded to collect combinations of our 36 possible polarization-tilt-view con-  
167 figurations into what we call *excitation sampling schemes*, summarized in **Table**  
168 **S1**.

169 Our first scheme, named **All**, consists of a loop through all six polarizations includ-  
170 ing a repeat of the  $0^\circ$  polarization for bleaching estimation, all three tilts, and both  
171 views for a total of 42 samples. The **All** scheme oversamples fluorescent dipole emitters,  
172 but it is useful for calibrating with fixed samples like GUVs.

173 Our second scheme, named **Six no tilt**, consists of three transverse polarizations  
174 and both views for a total of six samples. The **Six no tilt** scheme undersamples the  
175 fluorescent dipole emitters, and it leaves some orientations unmeasured—see main text  
176 **Figure 3**.

177 Our final scheme, named **Six with tilt**, consists of six total samples, each acquired  
178 with a different transverse polarization, tilt, and view. The **Six with tilt** scheme is  
179 an optimized sampling scheme chosen to maximize the angular information we desire  
180 with a minimal number of samples. We performed an exhaustive search through all  
181  $\binom{36}{6} \approx 2 \times 10^6$  possible 6-sample schemes available to our instrument, and we chose  
182 the scheme that optimized the singular spectrum of the instrument—see **Supplement**  
183 **8.3** for details.

## 184 3 Data acquisition

185 To implement polarization imaging, we extended our original LabVIEW control soft-  
186 ware [4] to incorporate LC module control, beam tilting control, and additional  
187 functions that facilitated system alignment and calibration. Before imaging biological

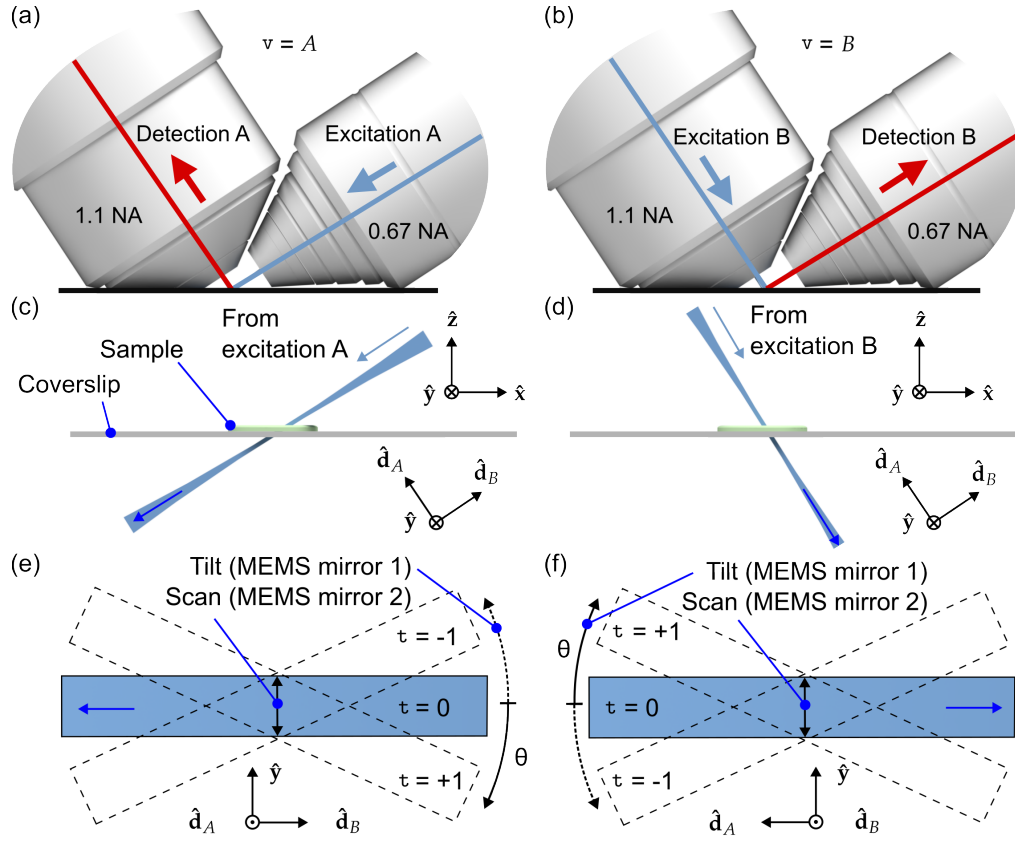

**Fig. S2 Schematic of light-sheet views, scanning, and tilting.** Columns: The first and second columns describe data acquired from views A and B, respectively. (a) View A illuminates the sample with a light-sheet from the 0.67 NA objective (blue arrow) and detects emitted light with the 1.1 NA objective (red arrow). (b) Similarly, view B illuminates with the 1.1 NA objective and detection with the 0.67 NA objective. (c) A view of a stationary Gaussian beam from excitation objective A illuminating a sample (green) on a coverslip. Here and throughout the figure, the blue arrow indicates the direction of light propagation. (d) Similarly, a view of a stationary Gaussian beam from excitation objective B. Subfigures (a)–(d) share a coordinate system with an  $\hat{x}$ - $\hat{y}$ - $\hat{z}$  coordinate system defined with respect to the coverslip and a  $\hat{d}_A$ - $\hat{d}_B$ - $\hat{y}$  coordinate system defined with respect to the objectives optical axis ( $\hat{d}_A$  and  $\hat{d}_B$  are shorthand for detection objective A and B, respectively). (e) A view of the illumination pattern A looking down the optical axis of detection objective A. The stationary Gaussian beam depicted in (c) and (d) can be scanned with MEMS mirror 2 to form a light sheet (blue rectangle), and tilted with MEMS mirror 1 to form tilted light sheets (dashed lines) labelled with their shorthand indices  $\tau \in \{-1, 0, +1\}$ . Alternatively, the light-sheet tilt angles can be described by their tilt angle  $\theta$  where positive/negative angles are measured from the  $\hat{d}_B$  axis to the negative/positive  $\hat{y}$  axis shown with a solid/dotted arrow. Note that the tilt angles are exaggerated for clarity; the real tilt angles are less than half the angles shown here. (f) Similarly, a view of illumination pattern B looking down the optical axis of detection objective B.

188 samples, the system was aligned (Supplement 3.1) and calibrated (Supplement  
189 3.2).

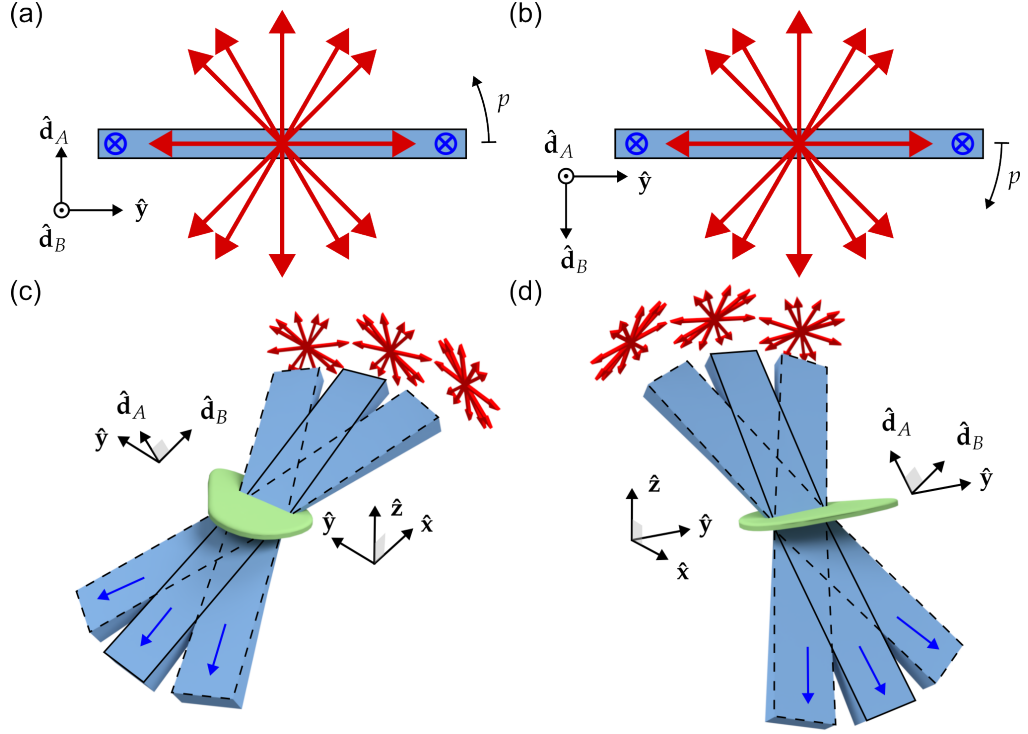

**Fig. S3 Schematic of light-sheet polarization settings.** Columns: The first and second columns describe data acquired from views A and B, respectively. (a) A view of a non-tilted illumination light sheet A (blue rectangle) looking down the optical axis of excitation objective A ( $\hat{\mathbf{d}}_B$ ) with light propagating into the page (blue arrows). Red arrows indicate the linear transverse polarization states selected by the LCVR at orientations  $p \in \{0^\circ, 45^\circ, 60^\circ, 90^\circ, 120^\circ, 135^\circ\}$ , where  $p$  is the angle from the  $\hat{\mathbf{y}}$  axis in the direction of the  $\hat{\mathbf{d}}_A$  axis. (b) Similarly, a view of a non-tilted illumination light sheet B looking down the optical axis of excitation objective B ( $\hat{\mathbf{d}}_A$ ), where  $p$  is the angle between the  $\hat{\mathbf{y}}$  axis and the  $\hat{\mathbf{d}}_B$  axis. (c) An overview of all 18 possible samples from view A—six polarization settings for each of three tilt settings. Notice that tilting the light sheet makes new polarization orientations accessible while illuminating the same positions in the sample. (d) Similarly, an overview of all 18 possible samples from view B.

### 190 3.1 Alignment

191 To set up the imaging system, we perform an alignment routine to find the voltages  
 192 to apply to the LC modules and the MEMS mirrors.

193 1. **Transverse polarization settings:** We use a wire-grid linear polarizer and a  
 194 power meter to determine the LCVR voltages required to generate the polarization  
 195 states, see **Figure S4**.

196 (a) Mount the polarizer and power meter so that they are aligned with the optical  
 197 axis of view A's illumination objective (the propagation direction of the beam  
 198 from 0.67 NA objective when no tilt or scanning is applied), see **Figure S4(a)**.



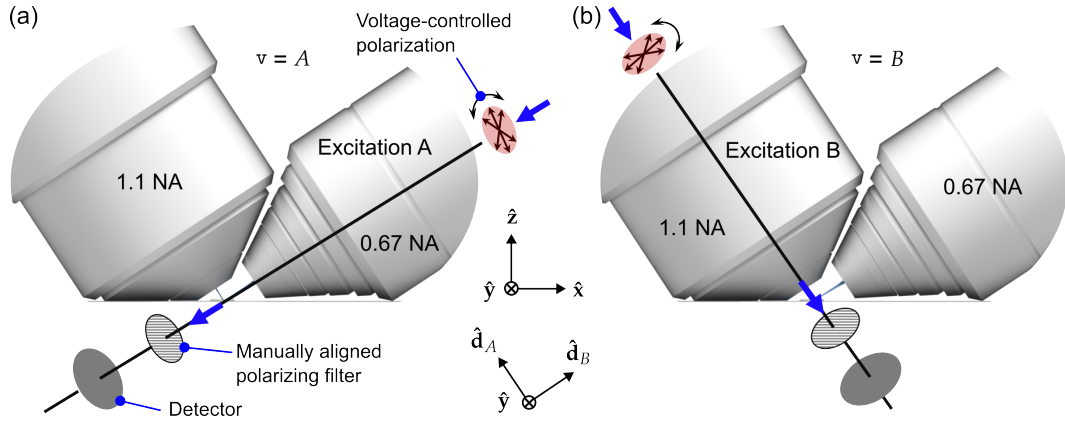

**Fig. S4 Procedure for finding the LCVR voltages that generate different illumination polarizations.** We mount a wire-grid linear polarizer and a power detector along the (a) view A illumination path, then (b) view B illumination path. To determine the LCVR voltages for generating the 6 polarization states, we orient the polarizer's transmission axis perpendicular to the desired illumination polarization orientation, then vary the LCVR voltages to extinguish the beam at the detector.

- 199 (b) For a specific polarization configuration, e.g.,  $0^\circ$ , orient the polarizer's transmission  
200 axis perpendicular to the desired polarization orientation.  
201 (c) With the laser on, vary the voltages on the two LCVRs (in the arm of view A  
202 illumination) until the readout of the detector is minimized (i.e find the voltage  
203 at which extinction is achieved, usually with a polarization extinction ratio  
204  $>200:1$ ), then record the voltages for this polarization configuration.  
205 (d) Repeat steps (b) and (c) for all six polarization configurations and record the  
206 voltages.  
207 (e) Unmount the polarizer and power meter from view A, and remount them to  
208 view B as shown in **Figure S4(b)**. Repeat steps (b), (c), and (d) to find the  
209 voltages for the 6 polarization configurations of view B.
- 210 **2. Beam tilt settings:** We choose and measure our illumination tilt angles by imaging  
211 a fluorescent bead solution (100 nm yellow-green beads, 1000-fold dilution) then:  
212 (a) Starting with the view A illumination path, we illuminate with a non-scanned  
213 Gaussian beam and increase the tilt angle until the image quality noticeably  
214 degrades near the edge of the field of view. We record the MEMS mirror voltage,  
215 record an image of the stationary beam (see **Figure S5**) and measure its tilt  
216 angle from the image.  
217 (b) Repeat step (a) for the opposite tilt and non-tilted conditions.  
218 (c) Repeat steps (a) and (b) for view B.

## 219 3.2 Calibration

220 Although our alignment routine gives us some confidence that the polarization orienta-  
221 tions and tilts are where we expect them to be, in practice we find that day-to-day use  
222 and realignment of the microscope causes measurable drift of the illumination states.

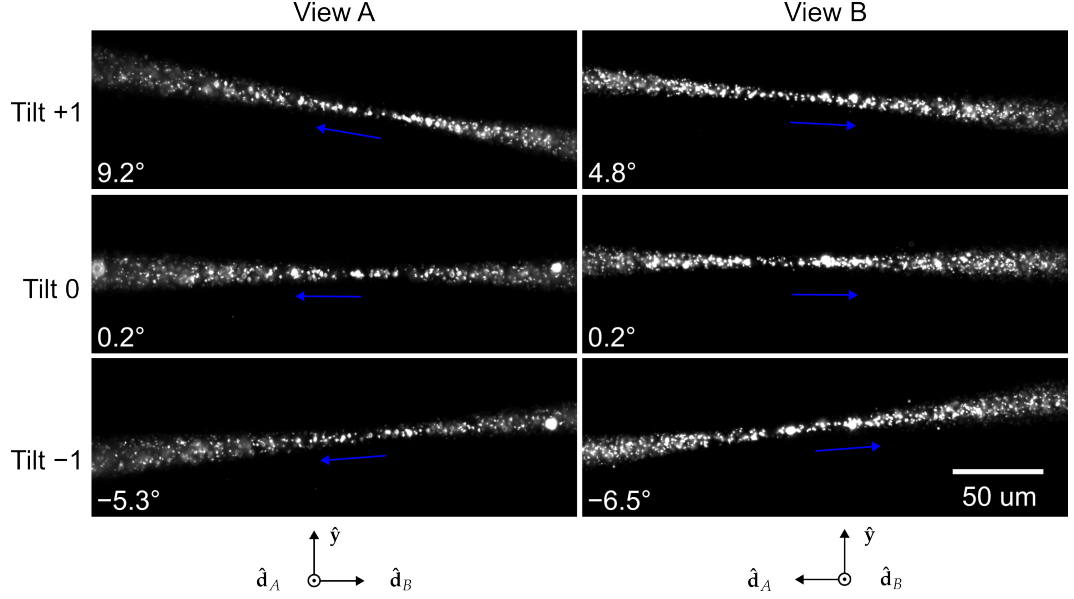

**Fig. S5** Images of fluorescent beads in solution under different illumination beam tilts (rows) and views (columns). Axis orientations for each view are shown at the bottom of each column, and the propagation directions are indicated with blue arrows. The orientation of the columns in this figure match **Figure S2(e, f)**.

223 In addition, we find empirically that the number of counts measured on each arm  
 224 drifts independently. These variations led us to develop a calibration routine where  
 225 we acquire data from a spatially and angularly uniform sample, an autofluorescent  
 226 plastic slide (Chroma 92001). Immediately preceding each acquisition:

- 227 1. We mount an autofluorescent plastic slide in the microscope chamber.
- 228 2. We acquire three-dimensional volumes from within the fluorescent slide under all  
 229 36 illumination configurations. We record these data in a four-dimensional array  
 230  $g_{(p,\mathbf{t},\mathbf{v})}^{(\text{cal})}(\mathbf{r}_d)$  where the tuple  $(p, \mathbf{t}, \mathbf{v})$  indexes the 36 illumination configurations, and  
 231  $\mathbf{r}_d$  is a three-dimensional detection coordinate.
- 232 3. We average the measured intensities over a volume  $V$  from deep within the  
 233 sample, and we record the 36 averaged calibration values in a vector  $\bar{g}_{(p,\mathbf{t},\mathbf{v})}^{(\text{cal})} =$   
 234  $\frac{1}{|V|} \sum_{\mathbf{r}_d \in V} g_{(p,\mathbf{t},\mathbf{v})}^{(\text{cal})}(\mathbf{r}_d)$ .

235 We use the calibration values  $\bar{g}_{(p,\mathbf{t},\mathbf{v})}^{(\text{cal})}$  to correct our raw data immediately before  
 236 performing a reconstruction, see **Supplement 7.2** for details.

237 Note that we performed the alignment procedure approximately twice a year, while  
 238 we performed the calibration procedure immediately before or after every acquisition  
 239 session.

### 240 3.3 Acquisition order

241 We acquired volumetric data by scanning the sample stage through a stationary light  
242 sheet, acquiring fluorescence images with 15–50 ms exposures for each image. Unless  
243 stated otherwise, the step size for all data was set to 1  $\mu\text{m}$  per stage step (0.549  $\mu\text{m}$   
244 after deskewing in View A, 0.836  $\mu\text{m}$  in View B). We acquired image volumes in  
245 both views before we changed the polarization/tilt state and acquired the next pair  
246 of volumes from both views. Our fastest volume acquisitions required 15 ms per slice  
247 for 40 slices for a total acquisition time of 0.6 s per volume. Our fastest complete  
248 acquisition required 0.6 s per volume for 6 volumes, making our fastest 3D-orientation-  
249 resolved time resolution 3.6 s.

250 For multicolor imaging, all views, polarizations, and tilts for one color were  
251 acquired, followed by all views, polarizations, and tilts for the next color until all colors  
252 were acquired.

253 In summary, we acquired datasets with as many as eight dimensions, and each  
254 dimension was collected in a loop in the following order from fastest to slowest: ( $xy$ )  
255 camera frame, ( $z$ ) stage scan positions, ( $v$ ) views, ( $p$ ) polarization, ( $\tau$ ) tilts, ( $c$ ) colors,  
256 ( $T$ ) time points.

## 257 4 Preprocessing

### 258 4.1 Deskewing

259 Since volumetric data were acquired by scanning the sample stage, raw images  
260 were deskewed, see Kumar et al. for details [5], then cropped to save storage and  
261 computational expense.

### 262 4.2 Registration

263 After deskewing, the two view images were interpolated and upsampled to an isotropic  
264 voxel size of 130 nm  $\times$  130 nm  $\times$  130 nm. Then view B (0.67 NA objective illumination  
265 and 1.1 NA objective detection) images were rotated by  $-90$  degrees about the  $\hat{y}$ -  
266 axis so that they were coarsely aligned to View B (1.1 NA objective illumination and  
267 0.67 NA objective detection) images. To estimate a registration transformation, we  
268 averaged the volumes acquired under different illumination conditions (polarizations,  
269 tilts) into a single volume for each view, then estimated the 12-dimensional affine  
270 transformation that maximized the cross correlation of the two volumes. Finally, we  
271 applied the estimated transformation to all of raw data volumes acquired in view  
272 B. All optimizations and transformations were performed with GPU-based 3D affine  
273 registration routines [6].

274 We found that averaging each view over illumination polarizations and tilts before  
275 estimating a registration transformation led to the most accurate registrations. When  
276 imaging a static sample with spatially varying oriented fluorescent dipoles, changing  
277 the illumination polarization will result in different regions of the sample appearing  
278 with different intensities. These shifts in intensity can be incorrectly identified as mis-  
279 registrations, which can lead to incorrect registration transformations. We reasoned

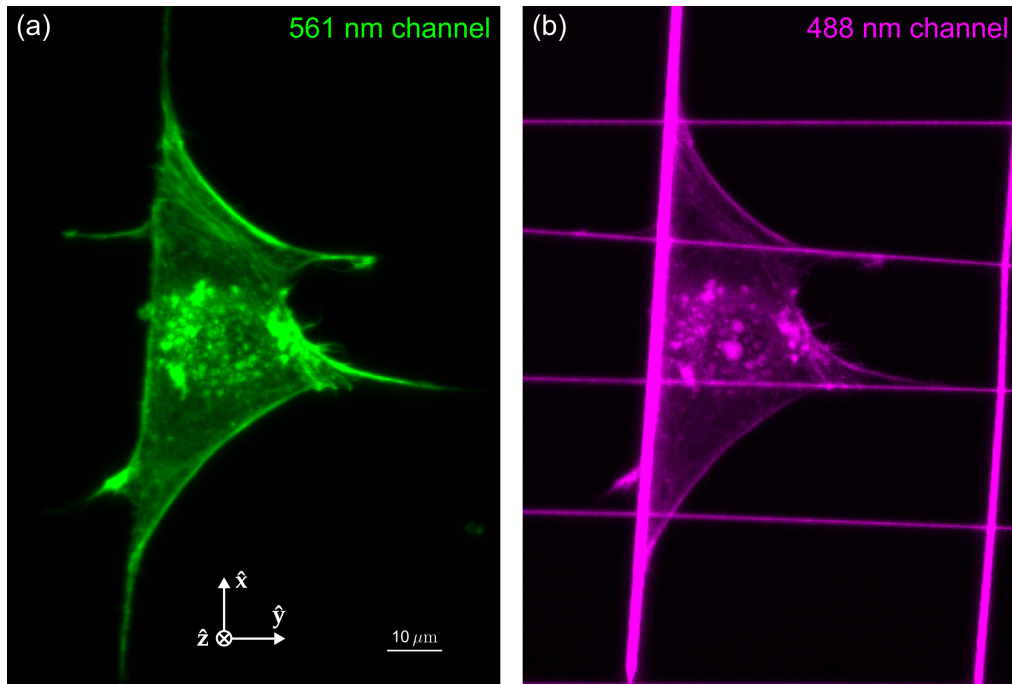

**Fig. S6** MIPs of raw nanowire data in two channels. (a) 561 nm channel showing Alexa Fluor 568 phalloidin in one of six polarization channels. (b) 488 nm channel showing nanowires and crosstalk from the 561 nm channel. We hand annotated nanowires from the high-contrast 488 nm channel, then used the wire locations for further nanowire analysis.

280 that our registration algorithm should not be sensitive to any apparent shifts in inten-  
 281 sity from a single view, so we averaged over illumination polarizations and tilts before  
 282 estimating a registration transformation.

### 283 4.3 Nanowire annotation

284 We manually annotated nanowires in 3D from a dedicated 488 nm channel. For exam-  
 285 ple, **Figure S6(b)** shows the raw data we used to annotate nanowires for **main-text**  
 286 **Figure 4**.

287 For each nanowire we loaded the 488 nm volume in 3D, viewed slices of the volumes  
 288 with normals approximately parallel to the the long axes of the wire (e.g.  $\hat{y} - \hat{z}$  slices  
 289 for the wires along the  $\hat{x}$  axis,  $\hat{x} - \hat{z}$  slices for the wires along the  $\hat{y}$  axis), then clicked  
 290 the wire every  $\sim 20 \mu\text{m}$ . We estimate that we were able to locate the centers of the  
 291 nanowires within  $\sim 2$  voxels = 260 nm.

292

## 5 Point-response functions

293

294

295

In the upcoming sections we describe our model of the imaging system. We begin with notation tables in **Tables S2 and S3** before starting with our point-response function calculations.

296

### 5.1 Description of the data

297

298

299

300

301

302

303

304

Our imaging system illuminates the object with a sheet of light, collects a two-dimensional irradiance image, then scans the object through the stationary light sheet to build a three-dimensional dataset that we can index with a three-dimensional coordinate  $\mathbf{r}_d \in \mathbb{R}^3$ . We repeat these three-dimensional acquisitions for different combinations of transverse polarizations  $p$ , tilts  $\mathbf{t}$ , and views  $\mathbf{v}$ —that we write together in a tuple  $(p, \mathbf{t}, \mathbf{v})$ . This means that we can describe a complete set of irradiance measurements with  $g_{(p,\mathbf{t},\mathbf{v})}(\mathbf{r}_d) \in \mathbb{L}_2(\mathbb{R}^3)^N$ , where  $N$  is the total number of volume acquisitions.

305

306

307

308

All of our datasets consist of an equal number of transverse-polarization and tilt settings for each view, so it is convenient to combine the transverse-polarization index  $p$  and the tilt index  $\mathbf{t}$  into a single polarization index  $j$ . This allows us to rewrite our complete dataset as  $g_{j\mathbf{v}}(\mathbf{r}_d) \in \mathbb{L}_2(\mathbb{R}^3)^N$ —see **Supplement 2.4**.

309

### 5.2 General relationship between the object and the data

310

311

312

313

314

315

316

317

318

319

320

321

322

323

324

325

326

327

328

We start by creating a reasonably general description of fluorescent dipoles in a sample. First, consider an ensemble of two-state fluorescent molecules with aligned dipole absorption and emission moments. These molecules undergo spatial and angular diffusion while being excited with illumination light and decaying to emit photons that we can manipulate and detect. We make multiple measurements of the object by manipulating the excitation light or by manipulating the emitted photons onto our detectors, but we can not control the position, diffusion, or decay dynamics of the molecules. Our goal is to describe the relationship between the object and the data we measure, so that we can recover as much as possible about the position, orientation, and dynamics of these fluorescent molecules. Ideally enough information can be recovered that the experimentalist can draw new conclusions about the molecules and their environment.

We can describe this ensemble of molecules using two functions  $f^{(\text{gr})}(\mathbf{r}_o, \hat{\mathbf{s}}_o, t)$  and  $f^{(\text{ex})}(\mathbf{r}_o, \hat{\mathbf{s}}_o, t)$  that describe the number of molecules per unit volume at position  $\mathbf{r}_o \in \mathbb{R}^3$  per unit solid angle oriented along  $\hat{\mathbf{s}}_o \in \mathbb{S}^2$  per unit time at time  $t$  in the ground and excited states, respectively. We assume that these molecules are diffusing in a spatio-angular potential  $v(\mathbf{r}_o, \hat{\mathbf{s}}_o)$ , that they are decaying with a rate constant  $\kappa^{(\text{d})}(\mathbf{r}_o, \hat{\mathbf{s}}_o)$ , and that during measurement  $g_{j\mathbf{v}}(\mathbf{r}_d)$  they are being excited with a rate constant  $h_{j\mathbf{v}}^{(\text{ex})}(\mathbf{r}_d, \mathbf{r}_o, \hat{\mathbf{s}}_o)$ . These dynamics can be captured by the following pair of coupled differential equations

$$\frac{\partial}{\partial t} \begin{bmatrix} f^{(\text{ex})}(\mathbf{r}_o, \hat{\mathbf{s}}_o, t) \\ f^{(\text{gr})}(\mathbf{r}_o, \hat{\mathbf{s}}_o, t) \end{bmatrix} = \begin{bmatrix} \mathcal{D}_{\mathbf{v}} - \kappa^{(\text{d})}(\mathbf{r}_o, \hat{\mathbf{s}}_o) & h_{j\mathbf{v}}^{(\text{ex})}(\mathbf{r}_d, \mathbf{r}_o, \hat{\mathbf{s}}_o) \\ \kappa^{(\text{d})}(\mathbf{r}_o, \hat{\mathbf{s}}_o) & \mathcal{D}_{\mathbf{v}} - h_{j\mathbf{v}}^{(\text{ex})}(\mathbf{r}_d, \mathbf{r}_o, \hat{\mathbf{s}}_o) \end{bmatrix} \begin{bmatrix} f^{(\text{ex})}(\mathbf{r}_o, \hat{\mathbf{s}}_o, t) \\ f^{(\text{gr})}(\mathbf{r}_o, \hat{\mathbf{s}}_o, t) \end{bmatrix}, \quad (\text{S1})$$

329 where  $\mathcal{D}_v$  is a Smoluchowski operator that models spatio-angular diffusion

$$\mathcal{D}_v = \nabla \cdot \exp[-\beta v(\mathbf{r}_o, \hat{\mathbf{s}}_o)] \mathbf{D} \exp[\beta v(\mathbf{r}'_o, \hat{\mathbf{s}}'_o)], \quad (\text{S2})$$

330 where  $\nabla$  is a gradient on  $\mathbb{R}^3 \times \mathbb{S}^2$ ,  $\mathbf{D}$  is a generalized diffusion tensor, and  $\beta = 1/k_B T$ .

331 If the molecules start in the ground state with spatial density  $\rho(\mathbf{r}_o)$ , then the initial  
 332 condition is given by  $f^{(\text{ex})}(\mathbf{r}_o, \hat{\mathbf{s}}_o, 0) = 0$  and  $f^{(\text{gr})}(\mathbf{r}_o, \hat{\mathbf{s}}_o, 0) = \rho(\mathbf{r}_o)$ . After solving  
 333 **Equation S1** we can model the emission density during measurement  $g_{jv}(\mathbf{r}_d)$  from  
 334 time  $t_{jv}^{(\text{start})}(\mathbf{r}_d)$  to  $t_{jv}^{(\text{end})}(\mathbf{r}_d)$  as

$$f_{jv}^{(\text{em})}(\mathbf{r}_d, \mathbf{r}_o, \hat{\mathbf{s}}_o) = \int_{t_{jv}^{(\text{start})}(\mathbf{r}_d)}^{t_{jv}^{(\text{end})}(\mathbf{r}_d)} dt \kappa^{(d)}(\mathbf{r}_o, \hat{\mathbf{s}}_o) f^{(\text{ex})}(\mathbf{r}_o, \hat{\mathbf{s}}_o, t). \quad (\text{S3})$$

335 Finally, we can relate the irradiance measurements  $g_{jv}(\mathbf{r}_d)$  to object properties by inte-  
 336 grating the emission density  $f_{jv}^{(\text{em})}(\mathbf{r}_d, \mathbf{r}_o, \hat{\mathbf{s}}_o)$  weighted by the point-response function  
 337 of the imaging system  $h_{jv}^{(\text{det})}(\mathbf{r}_d, \mathbf{r}_o, \hat{\mathbf{s}}_o)$

$$g_{jv}(\mathbf{r}_d) = \int_{\mathbb{R}^3} d\mathbf{r}_o \int_{\mathbb{S}^2} d\hat{\mathbf{s}}_o h_{jv}^{(\text{det})}(\mathbf{r}_d, \mathbf{r}_o, \hat{\mathbf{s}}_o) f_{jv}^{(\text{em})}(\mathbf{r}_d, \mathbf{r}_o, \hat{\mathbf{s}}_o). \quad (\text{S4})$$

338 **Equations S3 and S4** describe a non-linear relationship between an object  
 339 property, the excited state population  $f^{(\text{ex})}(\mathbf{r}_o, \hat{\mathbf{s}}_o, t)$ , and the measured data, irradi-  
 340 ance measurements  $g_{jv}(\mathbf{r}_d)$ . Without additional assumptions about the sample, this  
 341 non-linearity will make it difficult to recover useful information about the sample.

### 342 5.3 Linear relationship between the object and the data

343 One way to find a linear relationship between object properties and the data is to  
 344 make assumptions about our object and measurements and arrange experimental condi-  
 345 tions that meet those assumptions. In [7] we showed that if (a) spatial diffusion is  
 346 negligible, (b) angular diffusion is consistent with a spherical rotor model, (c) excita-  
 347 tion is weak to avoid saturation effects, (d) angular diffusion times are long compared  
 348 to the fluorescence decay times, (e) exposure times are long compared to the diffusion  
 349 and fluorescence decay times, (f) and the measurements are collected long after initial  
 350 transient diffusion and fluorescence decay times (fluorescence dynamics have reached  
 351 a steady state), then the following relationship holds

$$g_{jv}(\mathbf{r}_d) = \int_{\mathbb{R}^3} d\mathbf{r}_o \int_{\mathbb{S}^2} d\hat{\mathbf{s}}_o h_{jv}(\mathbf{r}_d, \mathbf{r}_o, \hat{\mathbf{s}}_o) f(\mathbf{r}_o, \hat{\mathbf{s}}_o), \quad (\text{S5})$$

352 where

$$h_{jv}(\mathbf{r}_d, \mathbf{r}_o, \hat{\mathbf{s}}_o) = h_{jv}^{(\text{det})}(\mathbf{r}_d, \mathbf{r}_o, \hat{\mathbf{s}}_o) h_{jv}^{(\text{exc})}(\mathbf{r}_d, \mathbf{r}_o, \hat{\mathbf{s}}_o) \quad (\text{S6})$$

353 is the *spatio-angular point response function*, and

$$f(\mathbf{r}_o, \hat{\mathbf{s}}_o) = \rho(\mathbf{r}_o) \frac{\exp[-\beta v(\mathbf{r}_o, \hat{\mathbf{s}}_o)]}{\int_{\mathbb{S}^2} d\hat{\mathbf{s}} \exp[-\beta v(\mathbf{r}_o, \hat{\mathbf{s}})]} \quad (\text{S7})$$

354 is the *spatio-angular Boltzmann density*—the product of the labeling density  $\rho(\mathbf{r}_o)$  and  
 355 the angular Boltzmann distribution at each spatial point. The relationship between  
 356 the spatio-angular Boltzmann density  $f(\mathbf{r}_o, \hat{\mathbf{s}}_o)$  and the data  $g_{j\mathbf{v}}(\mathbf{r}_d)$  is linear, so the  
 357 spatio-angular Boltzmann density is a good candidate for us to reconstruct. Therefore,  
 358 **Equation S7** relates the sample properties  $\rho(\mathbf{r}_o)$  (the spatial labelling density) and  
 359  $v(\mathbf{r}_o, \hat{\mathbf{s}}_o)$  (the spatio-angular potential) to our reconstruction target  $f(\mathbf{r}_o, \hat{\mathbf{s}}_o)$ .

360 By writing the sample properties  $\rho(\mathbf{r}_o)$  and  $v(\mathbf{r}_o, \hat{\mathbf{s}}_o)$  without any time dependence,  
 361 we are making an additional assumption (g) that these sample properties do not  
 362 change appreciably over the course of a complete set of measurements  $g_{j\mathbf{v}}(\mathbf{r}_d)$ . When  
 363 we measure living samples that move on timescales faster than it takes us to acquire  
 364 a complete set of measurements,  $\sim 3.6$  s for our fastest acquisitions, this assumption  
 365 is no longer true, and we are in danger of misinterpreting sample motion as intensity  
 366 modulations that indicate an oriented sample.

367 We emphasize that the spatio-angular Boltzmann density is only a reasonable  
 368 target for linear reconstruction when conditions (a)–(g) are satisfied, and throughout  
 369 this paper we assume that conditions (a)–(g) are satisfied.

370 We now proceed to give explicit expressions for the excitation point-response  
 371 function  $h_{j\mathbf{v}}^{(\text{exc})}(\mathbf{r}_d, \mathbf{r}_o, \hat{\mathbf{s}}_o)$  and the detection point-response function  $h_{\mathbf{v}}^{(\text{det})}(\mathbf{r}_d, \mathbf{r}_o, \hat{\mathbf{s}}_o)$ .

## 372 5.4 Excitation point-response function

373 The excitation point-response function  $h_{j\mathbf{v}}^{(\text{exc})}(\mathbf{r}_d, \mathbf{r}_o, \hat{\mathbf{s}}_o)$  can be interpreted as the  
 374 probability of exciting a dipole emitter at position  $\mathbf{r}_o$  oriented along  $\hat{\mathbf{s}}_o$  when the  
 375 demagnified detector coordinate is in position  $\mathbf{r}_d$  and the sample is illuminated with  
 376 polarization  $j$  and imaged with view  $\mathbf{v}$ .

377 We create all of our illumination light sheets by scanning paraxial Gaussian beams,  
 378 so we assume that our illumination polarization does not vary spatially across the  
 379 illumination pattern. This allows us to factor the excitation point-response function  
 380 into two functions

$$h_{j\mathbf{v}}^{(\text{exc})}(\mathbf{r}_d, \mathbf{r}_o, \hat{\mathbf{s}}_o) = h_{\mathbf{v}}^{(\text{exc, sp})}(\mathbf{r}_d, \mathbf{r}_o) h_{j\mathbf{v}}^{(\text{exc, ang})}(\hat{\mathbf{s}}_o), \quad (\text{S8})$$

381 where  $h_{\mathbf{v}}^{(\text{exc, sp})}(\mathbf{r}_d, \mathbf{r}_o)$  is the *spatial* excitation point-response function and  
 382  $h_{j\mathbf{v}}^{(\text{exc, ang})}(\hat{\mathbf{s}}_o)$  is the *angular* excitation point-response function.

383 The form of the spatial excitation point-response function is simple to write for  
 384 each view individually. For view  $A$ , we illuminate the sample with a focused Gaussian  
 385 beam propagating along the negative  $\hat{\mathbf{d}}_B$  axis and scan the beam along the  $\hat{\mathbf{y}}$  axis to  
 386 create a light sheet in the  $\hat{\mathbf{d}}_B$ - $\hat{\mathbf{y}}$  plane, see **Figure S2(c, e)**, and we can model this

387 with

$$h_A^{(\text{exc, sp})}(\mathbf{r}_d, \mathbf{r}_o) = \left[ \frac{w_0}{w(\mathbf{r}_d \cdot \hat{\mathbf{d}}_B)} \right]^2 \exp \left[ \frac{-2 \left( (\mathbf{r}_d - \mathbf{r}_o) \cdot \hat{\mathbf{d}}_A \right)^2}{w(\mathbf{r}_d \cdot \hat{\mathbf{d}}_B)^2} \right], \quad (\text{S9})$$

388 where  $w_0$  is the beam waist radius,  $w(x) = w_0 \sqrt{1 + (x/x_R)^2}$  is the depth-dependent  
 389 beam radius, and  $x_R = \pi w_0^2 n_0 / \lambda$  is the Rayleigh range. Similarly, the spatial excita-  
 390 tion point-response function for view  $B$  can be written by swapping  $\hat{\mathbf{d}}_A$  and  $\hat{\mathbf{d}}_B$  in  
 391 **Equation S9**:

$$h_B^{(\text{exc, sp})}(\mathbf{r}_d, \mathbf{r}_o) = \left[ \frac{w_0}{w(\mathbf{r}_d \cdot \hat{\mathbf{d}}_A)} \right]^2 \exp \left[ \frac{-2 \left( (\mathbf{r}_d - \mathbf{r}_o) \cdot \hat{\mathbf{d}}_B \right)^2}{w(\mathbf{r}_d \cdot \hat{\mathbf{d}}_A)^2} \right]. \quad (\text{S10})$$

392 We can combine **Equations S9 and S10** into a single equation by defining a pair  
 393 of rotation matrices

$$\mathbf{R}_A = \begin{bmatrix} 1 & 0 & 0 \\ 0 & 1 & 0 \\ 0 & 0 & 1 \end{bmatrix}, \quad \mathbf{R}_B = \begin{bmatrix} 0 & 0 & 1 \\ 0 & -1 & 0 \\ 1 & 0 & 0 \end{bmatrix}, \quad (\text{S11})$$

394 and writing the complete spatial excitation point-response function as

$$h_v^{(\text{exc, sp})}(\mathbf{r}_d, \mathbf{r}_o, \hat{\mathbf{s}}_o) = \left[ \frac{w_0}{w(\mathbf{R}_v^{-1} \mathbf{r}_d \cdot \hat{\mathbf{d}}_B)} \right]^2 \exp \left[ \frac{-2 \left( \mathbf{R}_v^{-1} (\mathbf{r}_d - \mathbf{r}_o) \cdot \hat{\mathbf{d}}_A \right)^2}{w(\mathbf{R}_v^{-1} \mathbf{r}_d \cdot \hat{\mathbf{d}}_B)^2} \right]. \quad (\text{S12})$$

395 Finally, the normalized angular excitation point-response function is given by

$$h_{jv}^{(\text{exc, ang})}(\hat{\mathbf{s}}_o) = \frac{3}{\sqrt{4\pi}} (\hat{\mathbf{p}}_{jv} \cdot \hat{\mathbf{s}}_o)^2, \quad (\text{S13})$$

396 where  $\hat{\mathbf{p}}_{jv}$  is  $jv$ -th polarization axis, which models the  $\cos^2 \theta$ -dependence of excitation  
 397 where  $\theta$  is the angle between the polarization axis  $\hat{\mathbf{p}}_{jv}$  and the dipole axis  $\hat{\mathbf{s}}_o$ .

## 398 5.5 Three-dimensional shift invariance from uniform-thickness 399 illumination

400 We have assembled a complete excitation point-response function in **Equations S8,**  
 401 **S12, and S13**, but this model is expensive to compute. Fortunately, we can make  
 402 a reasonable approximation and find a three-dimensionally shift-invariant model that  
 403 captures the most important features of the illumination.

404 We assume that the illumination light sheet does not broaden appreciably across  
 405 our imaging field of view so that  $w(z) \approx w_0$ . Under this assumption the model in



406 **Equation S8** becomes shift-invariant, so we can make the substitution  $\mathbf{r} = \mathbf{r}_d - \mathbf{r}_o$   
 407 and write a simplified spatial excitation point-response function

$$h_{jv}^{(\text{exc, sp})}(\mathbf{r}, \hat{\mathbf{s}}_o) \stackrel{(\text{unif})}{=} \exp\left[-2(r_v^\parallel/w_0)^2\right], \quad (\text{S14})$$

408 where  $r_v^\parallel$  is a view-dependent axial coordinate given explicitly by

$$r_A^\parallel = \mathbf{r} \cdot \hat{\mathbf{d}}_A, \quad (\text{S15})$$

$$r_B^\parallel = \mathbf{r} \cdot \hat{\mathbf{d}}_B. \quad (\text{S16})$$

409 This uniform-sheet assumption is valid within approximately one Rayleigh range of  
 410 the beam's focus.

## 411 5.6 Detection point-response function

412 The detection point-response function  $h_{jv}^{(\text{det})}(\mathbf{r}_d, \mathbf{r}_o, \hat{\mathbf{s}}_o)$  can be interpreted as the proba-  
 413 bility of detecting a photon from a dipole emitter at position  $\mathbf{r}_o$  oriented along  $\hat{\mathbf{s}}_o$  when  
 414 the detector is in demagnified position coordinate  $\mathbf{r}_d$  and the sample is illuminated  
 415 with polarization  $j$  and imaged with view  $v$ .

416 Our detection point-response function is three-dimensionally shift invariant, i.e.  
 417 shifting  $\mathbf{r}_o$  and  $\mathbf{r}_d$  together will leave the function unchanged, so we can safely replace  
 418  $\mathbf{r}_d$  and  $\mathbf{r}_o$  with  $\mathbf{r} = \mathbf{r}_d - \mathbf{r}_o$ . Also, our measurements do not change when we modify  
 419 the illumination polarization or tilt, so we can safely drop the  $j$  dependence. Together,  
 420 these notational reductions allow us to seek a simplified form  $h_v^{(\text{det})}(\mathbf{r}, \hat{\mathbf{s}}_o)$ .

421 To model the detection point-response function,  $h_v^{(\text{det})}(\mathbf{r}, \hat{\mathbf{s}}_o)$ , we start by rewriting  
 422 it in view-dependent coordinates so that we can reuse results from the literature. If  
 423 we let  $h^{(\text{det}, 4f)}(\mathbf{r}^\perp, r^\parallel, \hat{\mathbf{s}}, \text{NA})$  denote the irradiance created at a demagnified off-axis  
 424 point  $\mathbf{r}^\perp$  on a two-dimensional detector behind an aplanatic  $4f$  optical system with a  
 425 paraxial tube lens and a detection objective with numerical aperture NA by an on-axis  
 426 dipole defocused by  $r^\parallel$  with orientation  $\hat{\mathbf{s}}$ , then the detection point-response function  
 427  $h_v^{(\text{det})}(\mathbf{r}, \hat{\mathbf{s}}_o)$  can be written in terms of  $h^{(\text{det}, 4f)}(\mathbf{r}^\perp, r^\parallel, \hat{\mathbf{s}}, \text{NA})$  as

$$h_v^{(\text{det})}(\mathbf{r}, \hat{\mathbf{s}}_o) = h^{(\text{det}, 4f)}(\mathbf{r}_v^\perp, r_v^\parallel, \hat{\mathbf{s}}_v, \text{NA}_v), \quad (\text{S17})$$

428 where the first argument

$$\mathbf{r}_v^\perp = \mathbf{R}_v^{-1} \mathbf{r} - [\mathbf{R}_v^{-1} \mathbf{r} \cdot \hat{\mathbf{d}}_A] \hat{\mathbf{d}}_A, \quad (\text{S18})$$

429 is a view-dependent transverse coordinate, the second argument

$$r_v^\parallel = \mathbf{R}_v^{-1} \mathbf{r} \cdot \hat{\mathbf{d}}_A \quad (\text{S19})$$

430 is a view-dependent axial coordinate, the third argument

$$\hat{\mathbf{s}}_v = \mathbf{R}_v^{-1} \hat{\mathbf{s}}_o \quad (\text{S20})$$

431 is a view-dependent angular coordinate, and the last argument is the view-dependent  
432 detection numerical aperture

$$\text{NA}_A = 1.1, \quad (\text{S21})$$

$$\text{NA}_B = 0.67. \quad (\text{S22})$$

433 The detection point spread function for an aplanatic  $4f$  optical system with a  
434 paraxial tube lens written in demagnified detection coordinates is given by [8–11]

$$h^{(\text{det},4f)}(\mathbf{r}^\perp, r^\parallel, \hat{\mathbf{s}}, \text{NA}) = \sum_{n,n'=0,1,2} b_{nn'}(\mathbf{r}^\perp, r^\parallel, \text{NA}) s_n s_{n'}, \quad (\text{S23})$$

435 where

$$b_{nn'}(\mathbf{r}^\perp, r^\parallel, \text{NA}) = \sum_{i=0,1} \beta_{in}(\mathbf{r}^\perp, r^\parallel, \text{NA}) \beta_{in'}^*(\mathbf{r}^\perp, r^\parallel, \text{NA}) \quad (\text{S24})$$

436 is the irradiance created at position  $\mathbf{r}^\perp$  on the detector when an  $s_n s_{n'}$  angular  
437 distribution is placed at defocus position  $r_o^\parallel$ ,

$$\beta_{in}(\mathbf{r}^\perp, r^\parallel, \text{NA}) = \int_{\mathbb{R}^2} d\boldsymbol{\tau} A(\boldsymbol{\tau}, \text{NA}) \Phi(\boldsymbol{\tau}, r^\parallel) \gamma_{in}(\boldsymbol{\tau}) \exp[i2\pi\boldsymbol{\tau} \cdot \mathbf{r}^\perp] \quad (\text{S25})$$

438 is the  $i$ th component of the electric field created at position  $\mathbf{r}^\perp$  on the detector by the  
439  $n$ th component of a dipole,

$$A(\boldsymbol{\tau}, \text{NA}) = (1 - (|\boldsymbol{\tau}|/\nu_m)^2)^{-1/4} \Pi(|\boldsymbol{\tau}|/\nu_c(\text{NA})) \quad (\text{S26})$$

440 is the aplanatic apodization function with full width  $\nu_c(\text{NA}) = 2\text{NA}/\lambda$  and  $\nu_m = n_o/\lambda$ ,

$$\Phi(\boldsymbol{\tau}, r^\parallel) = \exp\left[i2\pi r^\parallel \sqrt{\nu_m^2 - |\boldsymbol{\tau}|^2}\right] \quad (\text{S27})$$

441 encodes the defocus phase, the functions  $\gamma_{in}(\boldsymbol{\tau})$  model the  $i$ th field components in  
442 the pupil plane created by the  $n$ th component of a dipole where  $|\boldsymbol{\tau}|$  and  $\phi_\tau$  are polar  
443 coordinates in the pupil plane

$$\begin{aligned} \gamma_{00}(\boldsymbol{\tau}) &= \sin^2 \phi_\tau + \cos^2 \phi_\tau \sqrt{1 - (|\boldsymbol{\tau}|/\nu_m)^2}, & \gamma_{10}(\boldsymbol{\tau}) &= \frac{1}{2} \sin(2\phi_\tau) \left( \sqrt{1 - (|\boldsymbol{\tau}|/\nu_m)^2} - 1 \right), \\ \gamma_{01}(\boldsymbol{\tau}) &= \frac{1}{2} \sin(2\phi_\tau) \left( \sqrt{1 - (|\boldsymbol{\tau}|/\nu_m)^2} - 1 \right), & \gamma_{11}(\boldsymbol{\tau}) &= \cos^2 \phi_\tau + \sin^2 \phi_\tau \sqrt{1 - (|\boldsymbol{\tau}|/\nu_m)^2}, \\ \gamma_{02}(\boldsymbol{\tau}) &= |\boldsymbol{\tau}| \cos \phi_\tau, & \gamma_{12}(\boldsymbol{\tau}) &= |\boldsymbol{\tau}| \sin \phi_\tau, \end{aligned} \quad (\text{S28})$$

444 and  $s_n$  is the  $n$ th component of the dipole orientation coordinate  $\hat{\mathbf{s}}_o$ .

## 445 5.7 Gaussian axial response

446 We can write the complete point-response function under the uniform-sheet approxi-  
447 mation as

$$h_{jv}(\mathbf{r}, \hat{\mathbf{s}}_o) \stackrel{(\text{unif})}{=} \exp\left[-2(r_v^{\parallel}/w_0)^2\right] h_{jv}^{(\text{exc, ang})}(\hat{\mathbf{s}}_o) h^{(\text{det}, 4f)}(\mathbf{r}_v^{\perp}, r_v^{\parallel}, \hat{\mathbf{s}}_v, \text{NA}_v). \quad (\text{S29})$$

448 Next, we assume that the axial dependence of the  $4f$  detection point-response  
449 function is approximately Gaussian over the width of the excitation light sheet. That  
450 is

$$\exp\left[-2(r_v^{\parallel}/w_0)^2\right] h^{(\text{det}, 4f)}(\mathbf{r}_v^{\perp}, r_v^{\parallel}, \hat{\mathbf{s}}_v, \text{NA}_v) \quad (\text{S30})$$

$$\approx \exp\left[-2(r_v^{\parallel}/w_*)^2\right] h^{(\text{det}, 4f)}(\mathbf{r}_v^{\perp}, 0, \hat{\mathbf{s}}_v, \text{NA}_v), \quad (\text{S31})$$

451 where **Equation S30** is the unapproximated result, and **Equation S31** is the approx-  
452 imate result with the  $4f$ -detection point-response function evaluated at  $r_v^{\parallel} = 0$  and a  
453 new axial width  $w_* > w_0$ . Applying **Equation S31** to **Equation S29** yields

$$h_{jv}(\mathbf{r}, \hat{\mathbf{s}}_o) \stackrel{(\text{unif})}{\underset{(\text{Gauss})}{=}} \exp\left[-2(r_v^{\parallel}/w_*)^2\right] h_{jv}^{(\text{exc, ang})}(\hat{\mathbf{s}}_o) h^{(\text{det}, 4f)}(\mathbf{r}_v^{\perp}, 0, \hat{\mathbf{s}}_v, \text{NA}_v). \quad (\text{S32})$$

454 We can restate this assumption by claiming that the point-response function of  
455 the entire imaging system (both excitation and detection together) is approximately  
456 axially Gaussian for both viewing axes. Empirically, we find this to be true of our light  
457 sheets.

458 This assumption is also pragmatic—it is difficult to model and/or estimate the  
459 direct excitation width of the light sheet  $w_o$ , but it is straightforward to observe the  
460 total width of the light sheet  $w_*$ .

## 461 5.8 Summary of forward model and point-response function

462 We complete this section by summarizing our model of the imaging system. First, our  
463 high-level model of the imaging system is

$$g_{jv}(\mathbf{r}_d) = \int_{\mathbb{R}^3} d\mathbf{r}_o \int_{\mathbb{S}^2} d\hat{\mathbf{s}}_o h_{jv}(\mathbf{r}_d - \mathbf{r}_o, \hat{\mathbf{s}}_o) f(\mathbf{r}_o, \hat{\mathbf{s}}_o), \quad (\text{S33})$$

464 where  $g_{jv}(\mathbf{r}_d)$  is the irradiance measured on the detector at position  $\mathbf{r}_d$  under view  $v$   
465 and illumination polarization  $j$ ,  $f(\mathbf{r}_o, \hat{\mathbf{s}}_o)$  is the Boltzmann density at position  $\mathbf{r}_o$  and  
466 orientation  $\hat{\mathbf{s}}_o$ , and  $h_{jv}(\mathbf{r}_d - \mathbf{r}_o, \hat{\mathbf{s}}_o)$  is the point-response function under the uniform-  
467 thickness and axial-Gaussian approximations given explicitly by

$$h_{jv}(\mathbf{r}, \hat{\mathbf{s}}_o) = \exp\left[-2(r_v^{\parallel}/w_*)^2\right] h_{jv}^{(\text{exc, ang})}(\hat{\mathbf{s}}_o) h^{(\text{det}, 4f)}(\mathbf{r}_v^{\perp}, 0, \hat{\mathbf{s}}_v, \text{NA}_v), \quad (\text{S34})$$

468 where  $h_{jv}^{(\text{exc, ang})}(\hat{\mathbf{s}}_o)$  is given by **Equation S12** and  $h^{(\text{det}, 4f)}(\mathbf{r}_v^{\perp}, 0, \hat{\mathbf{s}}_v, \text{NA}_v)$  is given  
469 by **Equation S17**.

470 Notice that the uniform-thickness and axial-Gaussian point-response function is  
 471 three-dimensionally shift invariant, so we can write it in terms of  $\mathbf{r}_d - \mathbf{r}_o$ . We will  
 472 exploit this fact in the next section.

## 473 6 Transfer functions

474 **Equations S33 and S34** model how a spatial distribution of fluorescent dipoles  
 475  $f(\mathbf{r}_o, \hat{\mathbf{s}}_o)$  appear in our irradiance measurements  $g_{jv}(\mathbf{r}_d)$ , but this model is computa-  
 476 tionally inefficient because it requires expensive integrals over  $\mathbb{R}^3$  and  $\mathbb{S}^2$ . If we would  
 477 like to efficiently simulate and invert this model, we must find a simpler form.

### 478 6.1 Reformulating in terms of a transfer function

479 We will use two tools to rewrite our model in a more computationally efficient form.  
 480 First, the *spatial Fourier transform* will let us exploit the shift-invariance and spatial  
 481 band-limits of the imaging system so that we can turn the expensive convolution  
 482 integral over  $\mathbf{r}_o$  into an inexpensive FFT, multiplication, and inverse FFT. Second,  
 483 the *spherical Fourier transform* will let us exploit the band-limited excitation and  
 484 emission of dipolar fluorophores so that we can turn the expensive integral over  $\hat{\mathbf{s}}_o$   
 485 into an inexpensive sum over just fifteen terms.

486 The first key result is that we can rewrite **Equation S33** as

$$G_{jv}(\mathbf{v}) = \sum_{\ell=0}^{\infty} \sum_{m=-\ell}^{\ell} H_{jv,\ell m}(\mathbf{v}) F_{\ell m}(\mathbf{v}), \quad (\text{S35})$$

487 where

$$G_{jv}(\mathbf{v}) = \int_{\mathbb{R}^3} d\mathbf{r} g_{jv}(\mathbf{r}) \exp(-2\pi i \mathbf{r} \cdot \mathbf{v}) \quad (\text{S36})$$

488 is the *irradiance spectrum*,

$$H_{jv,\ell m}(\mathbf{v}) = \int_{\mathbb{R}^3} d\mathbf{r} \int_{\mathbb{S}^2} d\hat{\mathbf{s}}_o h_{jv}(\mathbf{r}, \hat{\mathbf{s}}_o) \exp(-2\pi i \mathbf{r} \cdot \mathbf{v}) Y_{\ell m}(\hat{\mathbf{s}}_o) \quad (\text{S37})$$

489 is the *dipole spatio-angular transfer function*, and

$$F_{\ell m}(\mathbf{v}) = \int_{\mathbb{R}^3} d\mathbf{r} \int_{\mathbb{S}^2} d\hat{\mathbf{s}}_o f(\mathbf{r}, \hat{\mathbf{s}}_o) \exp(-2\pi i \mathbf{r} \cdot \mathbf{v}) Y_{\ell m}(\hat{\mathbf{s}}_o) \quad (\text{S38})$$

490 is the sample's *dipole spatio-angular spectrum*,  $\mathbf{v} \in \mathbb{R}^3$  is a three-dimensional spatial-  
 491 frequency coordinate, and  $Y_{\ell m}(\hat{\mathbf{s}}_o)$  are the real spherical harmonic functions.

492 We have shown elsewhere [7] how to rewrite **Equation S33** in the form of  
 493 **Equation S35**. Briefly, starting with **Equation S33** we apply the convolution-  
 494 multiplication theorem then apply a generalized Plancherel theorem for spherical

495 functions

$$\int_{\mathbb{S}^2} d\hat{\mathbf{s}} p(\hat{\mathbf{s}})q(\hat{\mathbf{s}}) = \sum_{\ell=0}^{\infty} \sum_{m=\ell}^{\ell} P_{\ell m} Q_{\ell m}, \quad (\text{S39})$$

496 where  $p(\hat{\mathbf{s}})$  and  $q(\hat{\mathbf{s}})$  are arbitrary functions on the sphere, and  $P_{\ell m}$  and  $Q_{\ell m}$  are their  
497 spherical Fourier transforms defined by

$$P_{\ell m} = \int_{\mathbb{S}^2} d\hat{\mathbf{s}} p(\hat{\mathbf{s}}) Y_{\ell m}(\hat{\mathbf{s}}). \quad (\text{S40})$$

498 One way to understand the equivalence of **Equations S33 and S35** is that they  
499 both represent the same integral transform expressed in different bases—**Equation**  
500 **S33** in a standard basis of delta functions, and **Equation S35** in a basis of complex  
501 exponentials and spherical harmonics.

502 In the next section we will evaluate the integrals in **Equation S37** to find an  
503 explicit form for the dipole spatio-angular transfer function, but for now we will skip  
504 to a second key result:  $H_{j\nu, \ell m}(\mathbf{v})$  is only non-zero when  $|\mathbf{v}_{\nu}^{\perp}| < 2\text{NA}_{\nu}/\lambda$  and  $\ell = 0, 2$   
505 and 4. These limits are due to the transverse diffraction limit and the band-limited  
506 angular excitation and emission of dipolar fluorophores, and they let us further simplify  
507 **Equation S35** to a finite sum over a finite region in frequency space

$$G_{j\nu}(\mathbf{v}) = \sum_{\ell=0,2,4} \sum_{m=-\ell}^{\ell} H_{j\nu, \ell m}(\mathbf{v}) F_{\ell m}(\mathbf{v}) \quad \text{for } |\mathbf{v}_{\nu}^{\perp}| < 2\text{NA}_{\nu}/\lambda, \quad (\text{S41})$$

508 a computationally efficient way to simulate and invert our model.

## 509 6.2 Setting up the transfer function calculation

510 Our goal in this section is to evaluate the integrals in the dipole spatio-angular transfer  
511 function

$$H_{j\nu, \ell m}(\mathbf{v}) = \int_{\mathbb{R}^3} d\mathbf{r} \int_{\mathbb{S}^2} d\hat{\mathbf{s}}_o h_{j\nu}(\mathbf{r}, \hat{\mathbf{s}}_o) \exp(-2\pi i \mathbf{r} \cdot \mathbf{v}) Y_{\ell m}(\hat{\mathbf{s}}_o), \quad (\text{S42})$$

512 where  $h_{j\nu}(\mathbf{r}, \hat{\mathbf{s}}_o)$  is given by **Equation S34**. The details in this section are presented  
513 for those who wish to compute dipole spatio-angular transfer functions efficiently using  
514 Gaunt coefficients and Wigner D-matrices. Most readers can skip to **Supplement 6.5**  
515 for a summary of the results.

516 We start by plugging **Equation S34** into **S42** and rearranging terms

$$H_{j\nu, \ell m}(\mathbf{v}) = \int_{\mathbb{R}^3} d\mathbf{r} \exp\left[-2(r_{\nu}^{\parallel}/w_*)^2\right] \exp(-2\pi i \mathbf{r} \cdot \mathbf{v}) \times \\ \int_{\mathbb{S}^2} d\hat{\mathbf{s}}_o h_{j\nu}^{(\text{exc}, \text{ang})}(\hat{\mathbf{s}}_o) h^{(\text{det}, 4f)}(\mathbf{r}_{\nu}^{\perp}, 0, \hat{\mathbf{s}}_{\nu}, \text{NA}_{\nu}) Y_{\ell m}(\hat{\mathbf{s}}_o). \quad (\text{S43})$$

517 Next, we split the three-dimensional coordinate  $\mathbf{r}$  into  $(\mathbf{r}_v^\perp, r_v^\parallel)$  then evaluate the axial  
 518 integral and rearrange

$$H_{jv, \ell m}(\mathbf{v}) = \frac{\exp\left[-(w_* v_v^\parallel)^2/2\right]}{\sqrt{\pi/2}/w_*} \int_{\mathbb{S}^2} d\hat{\mathbf{s}}_o h_{jv}^{(\text{exc}, \text{ang})}(\hat{\mathbf{s}}_o) Y_{\ell m}(\hat{\mathbf{s}}_o) \times \int_{\mathbb{R}^2} d\mathbf{r}_v^\perp h^{(\text{det}, 4f)}(\mathbf{r}_v^\perp, 0, \hat{\mathbf{s}}_v, \text{NA}_v) \exp(-2\pi i \mathbf{r}_v^\perp \cdot \mathbf{v}_v^\perp), \quad (\text{S44})$$

519 where we have split the three-dimensional spatial frequency coordinate into its trans-  
 520 verse and axial components  $\mathbf{v} = (\mathbf{v}_v^\perp, v_v^\parallel)$ . We collect the spatial integral into its own  
 521 function, dropping the axial coordinate for convenience

$$H^{(\text{det}, 4f)}(\mathbf{v}_v^\perp, \hat{\mathbf{s}}_v, \text{NA}_v) = \int_{\mathbb{R}^2} d\mathbf{r}_v^\perp h^{(\text{det}, 4f)}(\mathbf{r}_v^\perp, 0, \hat{\mathbf{s}}_v, \text{NA}_v) \exp(-2\pi i \mathbf{r}_v^\perp \cdot \mathbf{v}_v^\perp), \quad (\text{S45})$$

522 then rewrite the complete transfer function as

$$H_{jv, \ell m}(\mathbf{v}) = \frac{\exp\left[-(w_* v_v^\parallel)^2/2\right]}{\sqrt{\pi/2}/w_*} \int_{\mathbb{S}^2} d\hat{\mathbf{s}}_o h_{jv}^{(\text{exc}, \text{ang})}(\hat{\mathbf{s}}_o) H^{(\text{det}, 4f)}(\mathbf{v}_v^\perp, \hat{\mathbf{s}}_v, \text{NA}_v) Y_{\ell m}(\hat{\mathbf{s}}_o). \quad (\text{S46})$$

523 This spherical integral is challenging to evaluate, so we will evaluate it in pieces.  
 524 First, we notice that this integral is a spherical Fourier transform of the product of  
 525 two functions, which we can simplify by using the spherical version of the convolution-  
 526 multiplication theorem

$$\int_{\mathbb{S}^2} d\hat{\mathbf{s}} p(\hat{\mathbf{s}}) q(\hat{\mathbf{s}}) Y_{\ell m}(\hat{\mathbf{s}}) = \sum_{\ell' m'} \sum_{\ell'' m''} \mathcal{G}_{\ell \ell' \ell''}^{m m' m''} P_{\ell'}^{m'} Q_{\ell''}^{m''}, \quad (\text{S47})$$

527 where

$$P_{\ell'}^{m'} = \int_{\mathbb{S}^2} d\hat{\mathbf{s}} p(\hat{\mathbf{s}}) Y_{\ell' m'}(\hat{\mathbf{s}}), \quad (\text{S48})$$

$$Q_{\ell''}^{m''} = \int_{\mathbb{S}^2} d\hat{\mathbf{s}} q(\hat{\mathbf{s}}) Y_{\ell'' m''}(\hat{\mathbf{s}}), \quad (\text{S49})$$

528 and

$$\mathcal{G}_{\ell \ell' \ell''}^{m m' m''} = \int_{\mathbb{S}^2} d\hat{\mathbf{s}} Y_{\ell m}(\hat{\mathbf{s}}) Y_{\ell' m'}(\hat{\mathbf{s}}) Y_{\ell'' m''}(\hat{\mathbf{s}}) \quad (\text{S50})$$

529 are the real Gaunt coefficients [12]. This identity lets us evaluate the spherical Fourier  
 530 transform of the individual functions  $h_{jv}^{(\text{exc}, \text{ang})}(\hat{\mathbf{s}}_o)$  and  $h^{(\text{det}, 4f)}(\mathbf{r}_v^\perp, 0, \hat{\mathbf{s}}_v, \text{NA}_v)$ , then  
 531 combine them using **Equation S47** to find the spherical Fourier transform of their

532 product. We will evaluate these spherical Fourier transforms in the next two section  
 533 before we complete the transfer function calculation.

### 534 6.3 Angular excitation transfer function

535 In this section we evaluate the following integral

$$\begin{aligned}
 H_{jv, \ell m}^{(\text{exc}, \text{ang})} &\equiv \int_{\mathbb{S}^2} d\hat{\mathbf{s}}_o h_{jv}^{(\text{exc}, \text{ang})}(\hat{\mathbf{s}}_o) Y_{\ell m}(\hat{\mathbf{s}}_o) \\
 &= \frac{3}{\sqrt{4\pi}} \int_{\mathbb{S}^2} d\hat{\mathbf{s}}_o (\hat{\mathbf{p}}_{jv} \cdot \hat{\mathbf{s}}_o)^2 Y_{\ell m}(\hat{\mathbf{s}}_o) \\
 &= \frac{1}{\sqrt{4\pi}} \int_{\mathbb{S}^2} d\hat{\mathbf{s}}_o [P_0(\hat{\mathbf{p}}_{jv} \cdot \hat{\mathbf{s}}_o) + 2P_2(\hat{\mathbf{p}}_{jv} \cdot \hat{\mathbf{s}}_o)] Y_{\ell m}(\hat{\mathbf{s}}_o) \\
 &= \sqrt{4\pi} \int_{\mathbb{S}^2} d\hat{\mathbf{s}}_o \left[ Y_{00}(\hat{\mathbf{p}}_{jv}) Y_{00}(\hat{\mathbf{s}}_o) + \frac{2}{5} \sum_{m'=-2}^2 Y_{2m'}(\hat{\mathbf{p}}_{jv}) Y_{2m'}(\hat{\mathbf{s}}_o) \right] Y_{\ell m}(\hat{\mathbf{s}}_o) \\
 &= \sqrt{4\pi} \left[ Y_{00}(\hat{\mathbf{p}}_{jv}) \delta_{0\ell} + \frac{2}{5} \sum_{m'=-2}^2 Y_{2m'}(\hat{\mathbf{p}}_{jv}) \delta_{2\ell} \delta_{mm'} \right] \\
 &= \sqrt{4\pi} Y_{\ell m}(\hat{\mathbf{p}}_{jv}) \left( \delta_{0\ell} + \frac{2}{5} \delta_{2\ell} \right), \tag{S51}
 \end{aligned}$$

536 where we have expanded in terms of Legendre polynomials  $P_\ell(x)$ , applied the spherical  
 537 harmonic addition theorem  $P_\ell(\hat{\mathbf{x}} \cdot \hat{\mathbf{y}}) = \frac{4\pi}{2\ell+1} \sum_{m'=-\ell}^{\ell} Y_{\ell m'}(\hat{\mathbf{x}}) Y_{\ell m'}(\hat{\mathbf{y}})$ , exploited the  
 538 orthonormality of the spherical harmonics  $\int_{\mathbb{S}^2} d\hat{\mathbf{s}} Y_{\ell m}(\hat{\mathbf{s}}_o) Y_{\ell' m'}(\hat{\mathbf{s}}_o) = \delta_{\ell\ell'} \delta_{mm'}$  where  
 539  $\delta_{\ell\ell'}$  is the Kronecker delta, then used the discrete sifting theorem  $\sum_{m'} f_{m'} \delta_{mm'} = f_m$ .  
 540 **Equation S51** shows that the angular excitation transfer function contains at most six  
 541 non-zero terms (one for  $\ell = 0$ , five for  $\ell = 2$ ), and these terms can be found efficiently  
 542 by evaluating the spherical harmonic functions along the illumination polarization axes  
 543  $\hat{\mathbf{p}}_{jv}$ . We will make explicit choices for our illumination polarizations in **Supplement**  
 544 **8.3**.

### 545 6.4 Detection transfer function

546 In this section we evaluate the following integral

$$H_{v, \ell m}^{(\text{det}, 4f)}(\mathbf{v}_v^\perp, \text{NA}_v) \equiv \int_{\mathbb{S}^2} d\hat{\mathbf{s}}_o H^{(\text{det}, 4f)}(\mathbf{v}_v^\perp, \mathbf{R}_v^{-1} \hat{\mathbf{s}}_o, \text{NA}_v) Y_{\ell m}(\hat{\mathbf{s}}_o), \tag{S52}$$

547 where we have explicitly written the angular coordinate as  $\hat{\mathbf{s}}_v = \mathbf{R}_v^{-1} \hat{\mathbf{s}}_o$  so that we can  
 548 evaluate the integral for both views.

549 In the same way that the Fourier-shift theorem can simplify spatial Fourier trans-  
 550 forms, here we seek an analogous simplification that will let us efficiently compute  
 551 the spherical Fourier transform of a rotated function. Suppose we have a spherical

552 function  $f(\hat{\mathbf{s}})$  and its spherical Fourier transform

$$F_{\ell m} = \int_{\mathbb{S}^2} d\hat{\mathbf{s}} f(\hat{\mathbf{s}}) Y_{\ell m}(\hat{\mathbf{s}}). \quad (\text{S53})$$

553 The spherical Fourier transform of same function in rotated coordinates is given by

$$F'_{\ell' m'} = \int_{\mathbb{S}^2} d\hat{\mathbf{s}} f(\mathbf{R}^{-1}\hat{\mathbf{s}}) Y_{\ell' m'}(\hat{\mathbf{s}}), \quad (\text{S54})$$

554 where  $\mathbf{R} \in \mathbb{SO}(3)$  is a rotation matrix. After making a change of coordinates  $\mathbf{R}^{-1}\hat{\mathbf{s}} \rightarrow \hat{\mathbf{s}}$

$$F'_{\ell' m'} = \int_{\mathbb{S}^2} d\hat{\mathbf{s}} f(\hat{\mathbf{s}}) Y_{\ell' m'}(\mathbf{R}\hat{\mathbf{s}}), \quad (\text{S55})$$

555 we expand  $f(\hat{\mathbf{s}})$  into a spherical-harmonic series

$$F'_{\ell' m'} = \int_{\mathbb{S}^2} d\hat{\mathbf{s}} \left[ \sum_{\ell=0}^{\infty} \sum_{m=-\ell}^{\ell} F_{\ell m} Y_{\ell m}(\hat{\mathbf{s}}) \right] Y_{\ell' m'}(\mathbf{R}\hat{\mathbf{s}}), \quad (\text{S56})$$

556 then rearrange to find

$$F'_{\ell' m'} = \sum_{\ell=0}^{\infty} \sum_{m=-\ell}^{\ell} \left[ \int_{\mathbb{S}^2} d\hat{\mathbf{s}} Y_{\ell m}(\hat{\mathbf{s}}) Y_{\ell' m'}(\mathbf{R}\hat{\mathbf{s}}) \right] F_{\ell m}. \quad (\text{S57})$$

557 The integral in square brackets is only non-zero when  $\ell = \ell'$ , so we perform the sum  
558 over  $\ell$  and give the integral its own symbol

$$F'_{\ell m'} = \sum_{m=-\ell}^{\ell} \Delta_{mm'}^{\ell}(\mathbf{R}) F_{\ell m}, \quad (\text{S58})$$

559 where

$$\Delta_{mm'}^{\ell}(\mathbf{R}) = \int_{\mathbb{S}^2} d\hat{\mathbf{s}} Y_{\ell m}(\hat{\mathbf{s}}) Y_{\ell m'}(\mathbf{R}\hat{\mathbf{s}}) \quad (\text{S59})$$

560 are the *real Wigner D-matrices*—see the appendix in Kautz et al. for a similar result  
561 [13]. The Wigner D-matrices are square  $(2\ell + 1) \times (2\ell + 1)$  matrices for each rotation  
562  $\mathbf{R}$  and band  $\ell$ , and these matrices can be used to calculate the spherical harmonic  
563 coefficients of a rotated function. Notice that rotations only change the spherical har-  
564 monic coefficients within each band since each band of spherical harmonics spans an  
565  $(2\ell + 1)$ -dimensional rotationally invariant subspace of  $\mathbb{L}_2(\mathbb{S}^2)$ .



566 We can apply **Equation S58** to simplify our target integral **Equation S52** into

$$H_{\ell m}^{(\text{det},4f)}(\mathbf{v}_v^\perp, \text{NA}_v) = \sum_{m=-\ell}^{\ell} \Delta_{mm'}^{\ell}(\mathbf{R}_v) \int_{\mathbb{S}^2} d\hat{\mathbf{s}}_o H^{(\text{det},4f)}(\mathbf{v}_v^\perp, 0, \hat{\mathbf{s}}_o, \text{NA}_v) Y_{\ell m}(\hat{\mathbf{s}}_o). \quad (\text{S60})$$

567 Our only remaining task is to evaluate the spherical Fourier transform of  
568  $h^{(\text{det},4f)}(\mathbf{r}_v^\perp, 0, \hat{\mathbf{s}}_o, \text{NA}_v)$ . Proceeding step by step, we start with our target integral

$$= \int_{\mathbb{S}^2} d\hat{\mathbf{s}}_o h^{(\text{det},4f)}(\mathbf{r}_v^\perp, 0, \hat{\mathbf{s}}_o, \text{NA}_v) Y_{\ell m}(\hat{\mathbf{s}}_o), \quad (\text{S61})$$

569 substitute **Equation S23** and separate the angular integral

$$= \sum_{nn'=0,1,2} \left[ \int_{\mathbb{S}^2} d\hat{\mathbf{s}}_o s_n s_{n'} Y_{\ell m}(\hat{\mathbf{s}}_o) \right] b_{nn'}(\mathbf{r}_v^\perp, 0, \text{NA}_v), \quad (\text{S62})$$

570 then notice that we can rewrite the integral in terms of the Gaunt coefficients

$$= \frac{4\pi}{3} \sum_{nn'=0,1,2} \mathcal{G}_{\ell 11}^{m\epsilon_n\epsilon_{n'}} b_{nn'}(\mathbf{r}_v^\perp, 0, \text{NA}_v), \quad (\text{S63})$$

571 where  $\epsilon_0 = 1$ ,  $\epsilon_1 = -1$ ,  $\epsilon_2 = 0$ .

572 We can now complete our calculation of the detection transfer function by  
573 substituting **Equation S63** into **Equation S60** to give the main result for this section

$$H_{\ell m}^{(\text{det},4f)}(\mathbf{r}_v^\perp, \text{NA}_v) = \frac{4\pi}{3} \sum_{m=-\ell}^{\ell} \Delta_{mm'}^{\ell}(\mathbf{R}_v) \sum_{nn'=0,1,2} \mathcal{G}_{\ell 11}^{m\epsilon_n\epsilon_{n'}} B_{nn'}(\mathbf{r}_v^\perp, 0, \text{NA}_v). \quad (\text{S64})$$

574 Calculating  $\Delta_{mm'}^{\ell}(\mathbf{R})$  efficiently for arbitrary  $\mathbf{R}$ ,  $\ell$ ,  $m$ , and  $m'$  is challenging—see  
575 Pinchon and Hoggan for one approach [14]. Fortunately, we only have two rotation  
576 matrices  $\mathbf{R}_v$ , and  $\mathcal{G}_{\ell 11}^{m\epsilon_n\epsilon_{n'}}$  is only non-zero for  $\ell = 0$  and  $\ell = 2$  terms (see Homeier for  
577 Gaunt coefficient selection rules [12]). This means we only need to calculate  $2(1^2+5^2) =$   
578  $52$  integrals, which is feasible symbolically. Most of these integrals are trivial and can  
579 be calculated by hand

$$\Delta_{00}^0(\mathbf{R}_v) = 1, \quad \Delta_{mm'}^2(\mathbf{R}_A) = \delta_{mm'}. \quad (\text{S65})$$

580 The remaining integrals can be evaluated with a computer algebra package, and we  
 581 write the values  $\Delta_{mm'}^2(\mathbf{R}_B)$  in matrix notation as

$$\Delta^2(\mathbf{R}_B) = \begin{bmatrix} 0 & -1 & 0 & 0 & 0 \\ -1 & 0 & 0 & 0 & 0 \\ 0 & 0 & -1/2 & 0 & \sqrt{3}/2 \\ 0 & 0 & 0 & 1 & 0 \\ 0 & 0 & \sqrt{3}/2 & 0 & 1/2 \end{bmatrix}. \quad (\text{S66})$$

582 As expected this matrix is involutory  $[\Delta^2(\mathbf{R}_B)]^{-1} = \Delta^2(\mathbf{R}_B)$ , because the matrix  
 583  $\mathbf{R}_B$  is involutory.

## 584 6.5 Complete spatio-angular transfer function

585 We now have all of the pieces for our complete spatio-angular transfer function.

$$H_{j\nu, \ell m}(\mathbf{v}) = \frac{\exp\left[-(w_* v_{\nu}^{\parallel})^2/2\right]}{\sqrt{\pi/2}/w_*} \sum_{\ell'm'} \sum_{\ell''m''} \mathcal{G}_{\ell\ell'\ell''}^{mm'm''} H_{j\nu, \ell'm'}^{(\text{exc}, \text{ang})} H_{\ell''m''}^{(\text{det}, 4f)}(\mathbf{v}_{\nu}^{\perp}, \text{NA}_{\nu}), \quad (\text{S67})$$

586 where

$$H_{j\nu, \ell m}^{(\text{exc}, \text{ang})} = \sqrt{4\pi} Y_{\ell m}(\hat{\mathbf{p}}_{j\nu}) \left( \delta_{0\ell} + \frac{2}{5} \delta_{2\ell} \right), \quad (\text{S68})$$

587 and

$$H_{\ell m}^{(\text{det}, 4f)}(\mathbf{r}_{\nu}^{\perp}, \text{NA}_{\nu}) = \frac{4\pi}{3} \sum_{m=-\ell}^{\ell} \Delta_{mm'}^{\ell}(\mathbf{R}_{\nu}) \sum_{nn'=0,1,2} \mathcal{G}_{\ell 11}^{m\epsilon_n \epsilon_{n'}} b_{nn'}(\mathbf{r}_{\nu}^{\perp}, 0, \text{NA}_{\nu}). \quad (\text{S69})$$

588 From our previous work we know that the excitation and detection transfer func-  
 589 tions are only non-zero for  $\ell = 0, 2$ , so the complete transfer function is only non-zero  
 590 for  $\ell = 0, 2, 4$ , which is at most 15 non-zero angular terms.

## 591 7 Reconstruction algorithm

### 592 7.1 Theoretical motivation

593 The spatio-angular transfer function  $H_{j\nu, \ell m}(\mathbf{v})$  tells us how an object's spatio-angular  
 594 spectrum  $F_{\ell m}(\mathbf{v})$  is transmitted to the data's spectrum  $G_{j\nu}(\mathbf{v})$  with the following  
 595 relationship

$$G_{j\nu}(\mathbf{v}) = \sum_{\ell m} H_{j\nu, \ell m}(\mathbf{v}) F_{\ell m}(\mathbf{v}). \quad (\text{S70})$$

596 Our goal in this section is to find an efficient way to estimate the object's spatio-angular  
 597 spectrum,  $\hat{\mathbf{F}}_{\ell m}(\mathbf{v})$ , from a noise-corrupted measurement of the data spectrum.

598 **Equation S70** shows that  $\mathbf{H}_{j\nu, \ell m}(\mathbf{v})$  can be interpreted as a matrix for each spatial  
 599 frequency  $\mathbf{v}$ , with rows indexed by  $j\nu$  and columns indexed by  $\ell m$ . This observation  
 600 lets us temporarily lift the notational burden of coordinates to rewrite **Equation S70**  
 601 in matrix-vector form

$$\mathbf{g} = \mathcal{H}\mathbf{f}, \quad (\text{S71})$$

602 where the matrix multiplication is implied.

603 A reasonable starting place for estimating the object  $\mathbf{f}$  from the data  $\mathbf{g}$  is to solve  
 604 the least-squares optimization problem

$$\hat{\mathbf{f}}^{(\text{LS})} = \underset{\mathbf{f}}{\operatorname{argmin}} |\mathbf{g} - \mathcal{H}\mathbf{f}|^2, \quad (\text{S72})$$

605 where  $|\mathbf{g}|$  is the  $\mathbb{L}^2$  norm of  $\mathbf{g}$ . This optimization problem has a closed-form solution  
 606 that is most easily expressed in terms of the singular system of  $\mathcal{H}$

$$\hat{\mathbf{f}}^{(\text{LS})} = \sum_{k=1}^R \frac{1}{\sqrt{\mu_k}} \mathbf{u}_k (\mathbf{v}_k \cdot \mathbf{g}), \quad (\text{S73})$$

607 where  $R$  is the rank of  $\mathcal{H}$ ,  $(\mathbf{v}_k \cdot \mathbf{g})$  is an inner product between vectors, and  $(\mu_k, \mathbf{u}_k, \mathbf{v}_k)$   
 608 is the singular system of  $\mathcal{H}$  that satisfies

$$\mathcal{H}^T \mathcal{H} \mathbf{u}_k = \mu_k \mathbf{u}_k, \quad (\text{S74})$$

$$\mathcal{H} \mathcal{H}^T \mathbf{v}_k = \mu_k \mathbf{v}_k, \quad (\text{S75})$$

609 where  $\mathcal{H}^T$  is the transpose of  $\mathcal{H}$ . This solution can be statistically justified as the  
 610 maximum-likelihood estimator for data corrupted by uncorrelated Gaussian noise [15,  
 611 ch. 13.3.4], but in practice division by small eigenvalues  $\mu_k$  can amplify noise to  
 612 unacceptable levels.

613 We address this problem by adding a *Tikhonov regularization* term to the  
 614 optimization problem

$$\hat{\mathbf{f}}^\eta = \underset{\mathbf{f}}{\operatorname{argmin}} |\mathbf{g} - \mathcal{H}\mathbf{f}|^2 + \eta |\mathbf{f}|^2, \quad (\text{S76})$$

615 where  $\eta$  is a positive constant. Once again, this optimization problem has a closed-form  
 616 solution in terms of the singular system of  $\mathcal{H}$

$$\hat{\mathbf{f}}^\eta = \sum_{k=1}^R \frac{\sqrt{\mu_k}}{\mu_k + \eta} \mathbf{u}_k (\mathbf{v}_k \cdot \mathbf{g}). \quad (\text{S77})$$

617 Statistically, adding a Tikhonov regularizer can be interpreted as applying a Bayesian  
618 prior that assumes the unknown parameters to be independent, zero-mean, Gaussian-  
619 distributed random variables with variance  $1/(2\eta)$  [15, ch. 15.3.3]. Even when this  
620 assumption is not strictly true, adding a Tikhonov regularizer is a practical way to  
621 control noise amplification.

622 We can rewrite **Equation S77** with coordinates as

$$\hat{\mathbf{F}}_{\ell m}^{\eta}(\mathbf{v}) = \sum_{k=1}^R \frac{\sqrt{\mu_k(\mathbf{v})}}{\mu_k(\mathbf{v}) + \eta} U_{k,\ell m}(\mathbf{v}) \sum_{j\mathbf{v}} V_{k,j\mathbf{v}}(\mathbf{v}) G_{j\mathbf{v}}(\mathbf{v}), \quad (\text{S78})$$

623 where  $U_{k,\ell m}(\mathbf{v})$  and  $V_{k,j\mathbf{v}}(\mathbf{v})$  are matrices with rows consisting of the right- and left-  
624 singular vectors of the spatio-angular transfer function  $\mathbf{H}_{j\mathbf{v},\ell m}(\mathbf{v})$ , respectively.

## 625 7.2 Practical description of the reconstruction algorithm

626 After deskewing and registering our raw volumes (see **Supplement 4**), we renormal-  
627 ize each volume using our initial calibration measurements (see **Supplement 3.2**).  
628 **Figure S7** shows an example of volume-averaged calibration measurements from a  
629 fluorescent lake. We found that our calibration data showed the expected  $\cos^2 \theta$ -type  
630 intensity variation across illumination polarizations, but we found the intensity vari-  
631 ations between tilts and views to vary between experimental runs, driven by changes  
632 in alignment of the two arms. Additionally, we found our imaging configuration intro-  
633 duced a  $\sim 10$ -15 degree polarization shift compared to the alignment configuration  
634 (**Figure S4**), measurable by fitting curves to the calibration data points. We suspect  
635 the detection-side dichroic filter is responsible for this polarization phase shift.

636 To correct for these effects we applied volume-wise calibration factors to the raw  
637 data. First, we used the curve-fit polarization phase shift and our model of the imag-  
638 ing system to calculate an expected set of intensities from a lake  $H_{j\mathbf{v},00}^{(\text{cal})}(\mathbf{0})$ . Second,  
639 we calculated volume-averaged measurements  $\bar{g}_{j\mathbf{v}}^{(\text{cal})}$  from our calibration data (see  
640 **Supplement 3.2**). Finally, we reasoned that we should apply normalized calibration  
641 factors to each volume, so we normalized both terms by their first  $j\mathbf{v}$  terms, specifically,  
642  $\bar{g}_{00}^{(\text{cal})}$  and  $H_{00,00}^{(\text{cal})}(\mathbf{0})$ . Altogether, our calibration correction takes the form

$$g_{j\mathbf{v}}(\mathbf{r}_d) = g_{j\mathbf{v}}^{(\text{raw})}(\mathbf{r}_d) \frac{\bar{g}_{00}^{(\text{cal})}}{\bar{g}_{j\mathbf{v}}^{(\text{cal})}} \frac{H_{j\mathbf{v},00}^{(\text{cal})}(\mathbf{0})}{H_{00,00}^{(\text{cal})}(\mathbf{0})}. \quad (\text{S79})$$

643 **Equation S79** applies a volume-wise correction to bridge the gap between our model  
644 of the instrument and our calibration measurements taken with a known sample.  
645 **Figure S8** shows the marginal improvement that the calibration procedure makes on  
646 the reconstructions we report here. In early iterations of the instrument we found the  
647 calibration procedure to be essential, but as the instrument stabilized and we refined  
648 our models we found the calibration procedure to be less necessary.

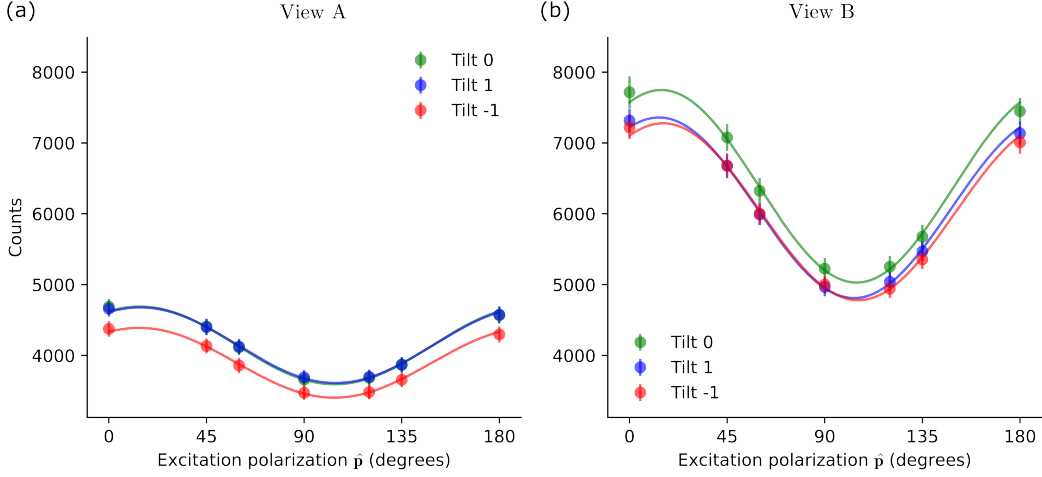

**Fig. S7** Volume-averaged calibration measurements from a fluorescent lake. We acquired volumes under seven polarization (dots), three different tilt angles (colors) with (a) view A and (b) view B. Each data point is the mean over an  $\sim 3.5 \times 3.5 \times 3.5 \mu\text{m}^3$  volume from deep within the fluorescent lake, and the error bars indicate the standard deviation of intensity values across the volume. For each set of polarization measurements we fit a curve of the form  $y = a \cos^2(x - b) + c$  (solid lines), then averaged the  $b$  estimates across tilts and views to estimate the system's polarization phase shift, here  $\sim 11$  degrees corresponding to the peak of the fit.

649 Next, we take the three-dimensional Fourier transform of each calibration-corrected  
 650 volume

$$G_{j\mathbf{v}}(\mathbf{v}) = \int_{\mathbb{R}^3} d\mathbf{r}_d g_{j\mathbf{v}}(\mathbf{r}_d) \exp[-2\pi i \mathbf{r}_d \cdot \mathbf{v}], \quad (\text{S80})$$

651 apply a Tikhonov-regularized pseudoinverse using a pre-computed singular system,  
 652 see **Supplement 7.1** for theoretical details and **Supplement 7.3** for practical tips,

$$\hat{\mathbf{F}}_{\ell m}^{\eta}(\mathbf{v}) = \sum_{k=1}^R \frac{\sqrt{\mu_k(\mathbf{v})}}{\mu_k(\mathbf{v}) + \eta} U_{k, \ell m}(\mathbf{v}) \sum_{j\mathbf{v}} V_{k, j\mathbf{v}}(\mathbf{v}) G_{j\mathbf{v}}(\mathbf{v}), \quad (\text{S81})$$

653 then we take an inverse three-dimensional Fourier transform

$$\hat{F}_{\ell m}^{\eta}(\mathbf{r}_o) = \int_{\mathbb{R}^3} d\mathbf{v} \hat{\mathbf{F}}_{\ell m}^{\eta}(\mathbf{v}) \exp[2\pi i \mathbf{r}_o \cdot \mathbf{v}], \quad (\text{S82})$$

654 and store the result. At visualization time, we complete our reconstruction by  
 655 calculating the spatio-angular Boltzmann distribution with

$$\hat{f}^{\eta}(\mathbf{r}_o, \hat{\mathbf{s}}_o) = \sum_{\ell m} \hat{F}_{\ell m}^{\eta}(\mathbf{r}_o) Y_{\ell m}(\hat{\mathbf{s}}_o). \quad (\text{S83})$$

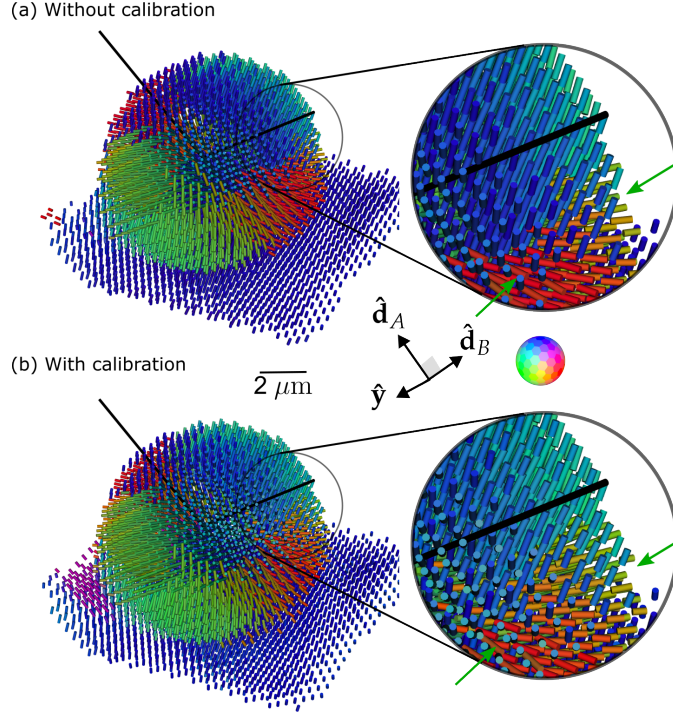

**Fig. S8** UV peak reconstruction from "All" polarization measurements (a) without and (b) with applying the calibration algorithm. We find that when the measurements match the model well, the calibration procedure makes only marginal improvements on the reconstruction, see inset and green arrows where the transition from blue to red orientations is smoother with calibration.

### 656 7.3 Practical precomputations

657 Our datasets commonly reach spatial sizes of  $1000 \times 1000 \times 1000 = 10^9$  voxels, so  
 658 6 acquired volumes can fill  $6 \times (4 \text{ bytes/value}) \times (10^9) \approx 24 \text{ GB}$ . If we naively pre-  
 659 computed the entire singular system, we would need to store 15 spherical harmonic  
 660 coefficients, 6 data-space coefficients, and 1 singular value for each of the 6 non-zero sin-  
 661 gular values at each spatial frequency totalling  $6(15+6+1) \times (10^9) \times (4 \text{ bytes/value}) \approx$   
 662  $500 \text{ GB}$  of data to perform a reconstruction. This is a significant burden that can be  
 663 alleviated with on-the-fly computation of the transfer functions.

664 First, we exploit the separability of the transfer function to compute and store a  
 665 small number of values that can be combined to generate all of the entries  $H_{j\nu, \ell m}(\mathbf{v})$ .  
 666 **Equation S67** shows a natural way to decompose the complete transfer function  
 667 into five parts—an spatial excitation part, an angular excitation part, a detection  
 668 part, real Gaunt coefficients, and real Wigner D-matrices—and each of these can be  
 669 precalculated, stored, and combined efficiently.

670 At reconstruction time, we use **Equation S67** to combine our stored values into a  
 671 complete transfer function at a given spatial frequency. We can take this  $6 \times 15$  matrix,  
 672 inexpensively compute its singular value decomposition, perform the reconstruction

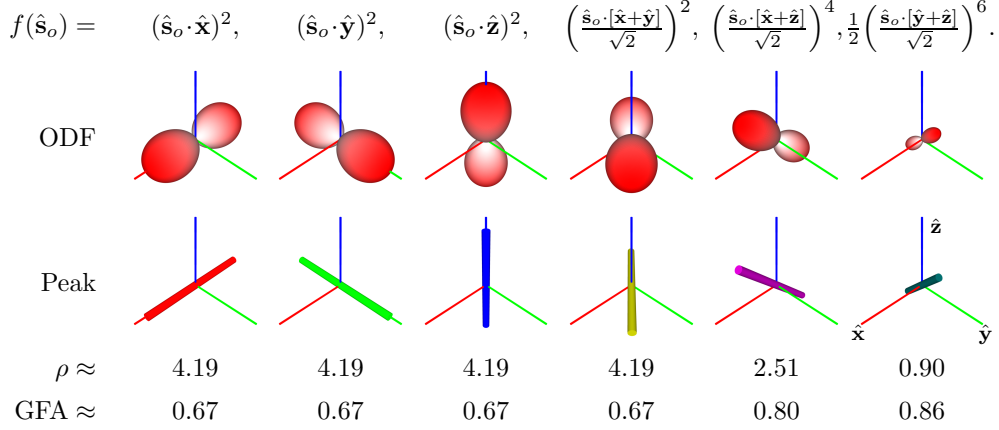

**Fig. S9** Demonstration of angular visualization schemes. Each column shows a different angular function for a single spatial point  $f(\hat{\mathbf{s}}_o)$  specified by the upper label. The first row shows an orientation distribution function (ODF) visualization that doubly encodes the magnitude of  $f(\hat{\mathbf{s}}_o)$  into the glyph radius and glyph color. Notice that red encodes the maximum for each glyph instead of a fixed value. The second row shows the peak directions visualized with an oriented cylinder colored using the absolute value method. Once again, the peak orientation is doubly encoded into the orientation and color of the cylinder. Finally, we calculate the density  $\rho$  and the generalized fractional anisotropy (GFA). These scalar values can be visualized using any color map.

673 using **Equation S81**, then repeat the process on the next spatial frequency. This  
674 approach reduces the precomputation storage burden while increasing computational  
675 demands at reconstruction time.

## 676 7.4 Orientation distribution functions and summary statistics

677 In this section we look at several ways to visualize and summarize the spatio-angular  
678 Boltzmann distributions that we estimate  $\hat{f}^\eta(\mathbf{r}_o, \hat{\mathbf{s}}_o)$ . **Figure S9** summarizes four  
679 ways to visualize individual spatial points from a spatio-angular reconstruction. We  
680 have found these visuals to be the most useful for understanding and interpreting  
681 reconstructions.

682 Starting with the stored reconstruction  $\hat{F}_{\ell m}^\eta(\mathbf{r}_o)$ , our goal is to calculate and plot  
683 useful visuals. To avoid storage inflation we have postponed our conversion to a stan-  
684 dard basis until visualization time. Our first step is to choose a set of  $N$  points on the  
685 sphere  $\{\hat{\mathbf{s}}_{o,n}\}$  that we would like to visualize. The Fibonacci lattice is an attractive  
686 choice because it leads to well-spaced points that are inexpensive to compute for arbi-  
687 trary  $N$ . The polar angles  $\{\theta_n\}$  and azimuthal angles  $\{\phi_n\}$  of the Fibonacci lattice with  
688  $N$  points are given by [16, 17]

$$\theta_n = \cos^{-1}(1 - (2n + 1)/N), \quad (\text{S84})$$

$$\phi_n = \pi(3 - \sqrt{5})n. \quad (\text{S85})$$

689 Choosing a larger  $N$  will make the final visuals appear smoother at additional compu-  
 690 tational expense. Empirically we have found that  $N = 500$  is an appropriate starting  
 691 point for most visualizations.

692 Next, we choose a set of spatial points  $\{\mathbf{r}_{o,n}\}$  where we would like to visualize  
 693 the object. We recommend starting with a modest number of spatial points by down-  
 694 sampling or thresholding the reconstruction because visualizing every spatial point  
 695 is visually overwhelming and computationally expensive. Empirically we have found  
 696 that visualizing more than  $10^4$  spatial points overwhelms most users who are trying  
 697 to interpret the results and most computers that are trying to render them without a  
 698 dedicated graphics card.

699 With our spherical points  $\{\hat{\mathbf{s}}_{o,n}\}$  and spatial points  $\{\mathbf{r}_{o,n}\}$  we can calculate the  
 700 *orientation distribution functions (ODFs)* at each point

$$\hat{f}^\eta(\mathbf{r}_{o,n}, \hat{\mathbf{s}}_{o,n}) = \sum_{\ell m} \hat{F}_{\ell m}^\eta(\mathbf{r}_{o,n}) Y_{\ell m}(\hat{\mathbf{s}}_{o,n}). \quad (\text{S86})$$

701 Notice that the spherical harmonics  $Y_{\ell m}(\hat{\mathbf{s}}_{o,n})$  can be computed once then reused. The  
 702 ODFs can be visualized by drawing a glyph at each point  $\{\mathbf{r}_{o,n}\}$  with a radius along  
 703 each direction  $\{\hat{\mathbf{s}}_{o,n}\}$  given by  $\hat{f}^\eta(\mathbf{r}_{o,n}, \hat{\mathbf{s}}_{o,n})$ . We use a blue-white-red color map to  
 704 doubly encode the value of  $\hat{f}^\eta(\mathbf{r}_{o,n}, \hat{\mathbf{s}}_{o,n})$  into the radius and the color of the glyph.

705 In addition to drawing a complete glyph at each point  $\{\mathbf{r}_{o,n}\}$ , we have found that  
 706 drawing a cylinder or thin line at each point  $\{\mathbf{r}_{o,n}\}$  along the direction where the  
 707 function is largest

$$\hat{\mathbf{s}}^{\eta,(\text{pk})}(\mathbf{r}_{o,n}) = \underset{\hat{\mathbf{s}}_o}{\text{argmax}} \hat{f}^\eta(\mathbf{r}_{o,n}, \hat{\mathbf{s}}_o) \quad (\text{S87})$$

708 is a good way to summarize and understand the reconstruction. In many cases the  
 709 viewing direction obscures the direction of the cylinder or line, so encoding the direc-  
 710 tion of the line in color can reduce visual degeneracy. In all of our reconstructions we  
 711 have colored the  $\hat{\mathbf{x}}$ ,  $\hat{\mathbf{y}}$ , and  $\hat{\mathbf{z}}$  components of  $\hat{\mathbf{s}}^{\eta,(\text{pk})}(\mathbf{r}_{o,n})$  with weighted red, green, and  
 712 blue color channels, respectively. In the computer graphics and magnetic resonance  
 713 imaging (MRI) literature this color mapping is usually called the *absolute value method*  
 714 [18]. Although the absolute value method is widely used and easy to understand, it  
 715 suffers from ambiguities that can be avoided by using more sophisticated color maps  
 716 [19].

717 We can also calculate and plot scalar summary statistics for each spatial point.  
 718 The estimated number of fluorophores at each point or *fluorophore density* is given  
 719 directly by

$$\hat{\rho}^\eta(\mathbf{r}_o) = \hat{F}_{00}^\eta(\mathbf{r}_o). \quad (\text{S88})$$



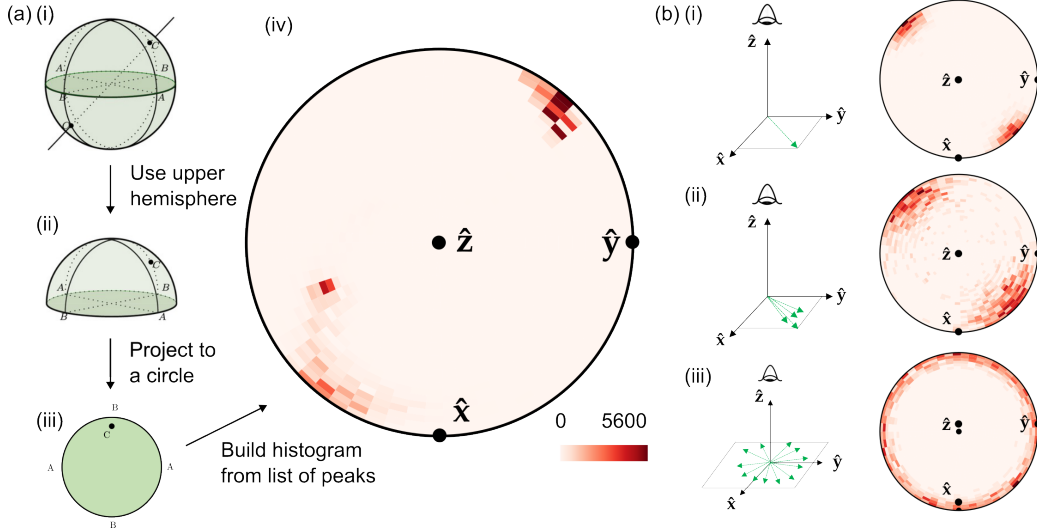

**Fig. S10 Peak histograms.** We build a peak histogram by (i) starting with a list of normalized 3D vectors, e.g. A, B, and C. A 3D vector and its antipodal point vector represent the same peak (e.g. A, B, and C appear twice and represent the same peak), so we can choose a viewing direction and (ii) flip vectors to the upper hemisphere to remove the ambiguity, then (iii) project the 3D vector to a 2D circle, then (iv) increment bins for each vector in the list. (b) Example histograms of dipole distributions viewed along the  $\hat{z}$  axis. Left, cartoons illustrating a small number of draws from an example distribution; right, simulated histograms with 1000 samples from Watson distributions  $f(\hat{\mathbf{s}}) \propto \exp[\kappa(\hat{\boldsymbol{\mu}} \cdot \hat{\mathbf{s}})]$ , where  $\hat{\boldsymbol{\mu}}$  is a direction and  $\kappa$  is a spread parameter. (i)  $\kappa = 20$ ,  $\hat{\boldsymbol{\mu}} = (\hat{x} + \hat{y})/\sqrt{2}$  (ii)  $\kappa = 5$ ,  $\hat{\boldsymbol{\mu}} = (\hat{x} + \hat{y})/\sqrt{2}$ , (iii)  $\kappa = -40$ ,  $\hat{\boldsymbol{\mu}} = \hat{z}$ . Subfigure (a) modified with permission from Günther Eder [22]

720 Another useful scalar summary statistic is the *generalized fractional anisotropy* [20,  
721 21], which is

$$\text{GF\AA}^\eta(\mathbf{r}_o) = \sqrt{1 - \frac{[\hat{F}_{00}^\eta(\mathbf{r}_o)]^2}{\sum_{\ell m} [\hat{F}_{\ell m}^\eta(\mathbf{r}_o)]^2}}. \quad (\text{S89})$$

722 Although both of these parameters are useful for summarizing the data, strictly speak-  
723 ing neither is estimable since they do not live in the measurement space of the imaging  
724 system [15, ch. 15.1.3]. We know that estimates of  $\rho$  and GFA can be biased, so we  
725 need to be skeptical of any conclusions drawn from them. Averaging over larger spatial  
726 regions can reduce (but not eliminate) these biases.

## 727 7.5 Peak histograms

728 **Figure S10** illustrates how we build peak histograms from a list of peaks. Starting  
729 with a list of 3D vectors representing peaks, we choose a viewing direction (e.g. the  $\hat{z}$

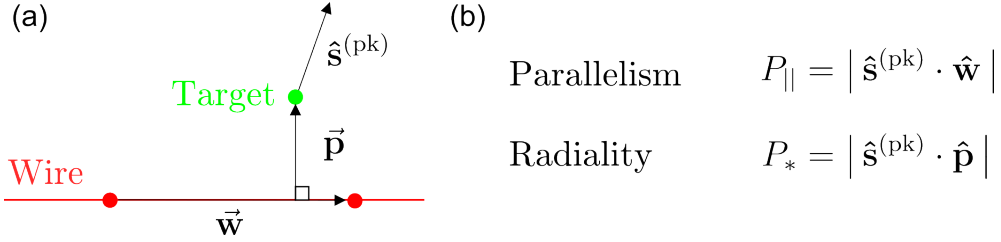

**Fig. S11 Peak metrics.** (a) For each target point (green dot), we find the nearest pair of annotated wire points (red dots). We use these three points to define two vectors:  $\vec{w}$ , the vector from one of the wire points to the other, and  $\vec{p}$ , the shortest vector from the wire to the target point. Additionally, we have the target point's peak direction  $\hat{s}^{(pk)}$  as the orientation along which the ODF is maximized. (b) We normalize  $\vec{w}$  and  $\vec{p}$  then define a pair of scalar metrics that we call parallelism and radiality.

730 axis in **main-text Figure 4**), flip the vectors to the upper hemisphere with respect  
 731 to the viewing direction, project the resulting vectors to a circle by dropping the  
 732 component along the viewing axis, then increment bins in a polar plot for each peak  
 733 in the list. We emphasize that the peak histogram depends on the viewing orientation.

734 Points near the center of the peak histogram represent peaks that have a large  
 735 component along the viewing axis, while points on the outer rim of the peak his-  
 736 togram represent peaks that lie in the plane perpendicular to the viewing direction.  
 737 For example, **Figure S10(b)(ii)** shows a histogram with peaks in the  $\hat{x} - \hat{y}$  plane  
 738 appearing on the outer rim of the histogram, and peaks with a significant  $\hat{z}$  compo-  
 739 nent appearing closer to the center of the histogram, while **Figure S10(b)(iii)** shows  
 740 a histogram where all peaks are nearly in the  $\hat{x} - \hat{y}$  plane and appear on the outer  
 741 rim of the histogram.

742 We are representing axes, not vectors, so in-plane peaks can be equivalently rep-  
 743 resented by points on opposite sides of the peak histogram. This means that a tightly  
 744 grouped set of nearly in-plane peaks with some peaks above and below the plane nor-  
 745 mal to the viewing axis will appear as two populations on opposite sides of the peak  
 746 histograms (see **Figure S10(a)(iv)** and **(b)** for examples).

747 Mathematically, the peaks are members of the real projective plane  $\mathbb{RP}^2$ , and we  
 748 are drawing histograms on a minimal 2D surface that represents this space.

## 749 7.6 Summary statistics with respect to nanowires

750 In **main-text Figure 6** we measure peak orientations with respect to the nearest  
 751 nanowires using a pair of metrics we call radiality and parallelism. After annotating  
 752 the nanowires manually from a separate channel (see **Supplement 4.3**), we calculated  
 753 each point's peak direction  $\hat{s}^{(pk)}$ , nearest wire direction  $\vec{w}$ , and the nearest wire's  
 754 normal direction pointing toward the target point  $\vec{p}$ , see **Figure S11(a)**. We use these  
 755 vectors to calculate parallelism and radiality, see **Figure S11(b)**.

756 Parallelism and radiality are scalar values between 0 and 1. A parallelism value of  
 757 1 (0) indicates a peak direction that is exactly parallel (perpendicular) to the nearest  
 758 wire, and a radiality value of 1 (0) indicates a peak direction that is exactly parallel  
 759 (perpendicular) to lines that point radially outwards from the wire.

## 760 7.7 Reconstruction and visualization summary

761 We complete this section by summarizing our reconstruction and visualization algo-  
762 rithms in **Table S4**. We accompany each step with numpy pseudocode to aid  
763 implementations, and we highlight the use of `np.einsum` [23], an efficient way to  
764 program multidimensional array multiplications inspired by Krister Åhlander’s C++  
765 library [24].

## 766 8 Choosing polarization and tilt samples

767 In **Supplement 2.5** we described the three polarization-tilt sampling schemes that  
768 we used to acquire datasets. In this section we describe how we chose and optimized  
769 these sampling schemes.

### 770 8.1 Why make six measurements?

771 Our goal is to choose a set of illumination polarizations  $\{\hat{\mathbf{p}}_{jv}\} \in (\mathbb{S}^2)^N$ — $N$  points  
772 on the sphere—that allow us to estimate valuable object parameters while keeping  $N$   
773 reasonably small so that our acquisition is fast and does not compromise our sample’s  
774 health.

775 The central question becomes: what object parameters should we try to estimate?  
776 Qualitatively, our goal is to recover as much angular information about our sample  
777 as possible, and the transfer functions described in **Supplement 6** provide clear  
778 bounds on what we can hope to recover. Specifically, we found that our instrument  
779 (and any fluorescence instrument that uses non-saturating single-photon excitation)  
780 is band limited to the  $\ell \in \{0, 2, 4\}$  spherical harmonics, which suggests a choice of  
781  $N = 1 + 5 + 9 = 15$  measurements to attempt to recover all 15 spherical harmonic  
782 coefficients in the zeroth-, second-, and fourth-order bands.

783 However, our instrument only gives us control over the polarizations we use to  
784 illuminate our sample, not the polarizations we detect. In **Supplements 6.3 and 6.4**  
785 we showed that the angular excitation and detection transfer functions individually  
786 transfer angular information from the  $\ell \in \{0, 2\}$  bands, and their combination transfers  
787 information from the  $\ell \in \{0, 2, 4\}$  bands. Since we only have polarization control over  
788 the illumination polarization, we can only meaningfully control what information we  
789 can collect from the  $\ell \in \{0, 2\}$  bands. Since we do not have enough degrees of freedom  
790 to completely sample the information in the  $\ell = 4$  band, we restrict our attention to the  
791  $\ell \in \{0, 2\}$  bands. This narrower goal suggests a choice of  $N = 1 + 5 = 6$  measurements.

792 We note that polarization control on both the illumination and detection arms can  
793 allow measurement of all fifteen terms in the  $\ell \in \{0, 2, 4\}$  bands, which is an angular  
794 analogue to structured illumination microscopy (SIM). For example, two-dimensional  
795 measurements with low-NA (widefield) illumination and high-NA detection results in a  
796  $2\text{NA}/\lambda$  cutoff, illumination with sinusoidal patterns created with a high-NA objective  
797 and measured with a small-NA detection objective results in an effective  $2\text{NA}/\lambda$  cutoff,  
798 then combining illumination with sinusoidal patterns created with a high-NA objective  
799 and measured with a high-NA detection objective results in an effective  $4\text{NA}/\lambda$  cutoff.

800 **8.2 Why use tilting light sheets?**

801 Our first iteration of the instrument described in this paper did not include the tilting  
 802 degree of freedom, so our accessible illumination polarizations were restricted to a set  
 803 of two great circles perpendicular to the illumination axes. Mathematically, this design  
 804 restricted our illumination polarizations to choices that satisfied

$$\hat{\mathbf{p}}_{jv} \cdot \mathbf{R}_v \hat{\mathbf{d}}_B = 0. \quad (\text{S90})$$

805 We attempted to choose six sample polarization illuminations subject to this constraint  
 806 that would allow us to recover the  $\ell \in \{0, 2\}$  spherical-harmonic coefficients, but we  
 807 found this to be impossible. Our key finding was that the  $\ell = 2$  band contains a *null*  
 808 *function of our imaging system*, an object that, when added or subtracted from any  
 809 object, generates identical data. Stated differently, we found that one of our six target  
 810 parameters was invisible to our instrument.

811 The null function of the non-tilting design, depicted in **Figure S12**, is the angular  
 812 distribution

$$f^{(\text{null})}(\hat{\mathbf{s}}_o) = \sin^2 \theta \cos \phi \sin \phi, \quad (\text{S91})$$

813 where  $\theta$  is measured from the  $\hat{\mathbf{y}}$  axis and  $\phi$  is measured from the  $\hat{\mathbf{d}}_B$  to the  $\hat{\mathbf{d}}_A$  axis in  
 814 the  $\hat{\mathbf{d}}_A - \hat{\mathbf{d}}_B$  plane. We can see that this is a null function by inspection. Any illumi-  
 815 nation polarization perpendicular to the detection axes will equally excite the positive  
 816 and negative lobes of the null function, resulting in zero irradiance. Equivalently, if we  
 817 have an arbitrary ODF and add any multiple of the null function to that ODF, the  
 818 resulting signal will be unchanged.

819 In practice, we found that this single null function caused our reconstructions to be  
 820 difficult to use and interpret. We found that we could not recover all three-dimensional  
 821 orientations, and our peak estimates would commonly show dramatically incorrect  
 822 orientations from known samples.

823 To overcome this limitation we augmented the instrument with the tilting degree  
 824 of freedom so that the propagation direction of the illumination light sheet was no  
 825 longer constrained to a single axis. In principle we could tilt the illumination light  
 826 sheet in any orientation, but most tilting orientations would move parts of light sheet  
 827 out of the focal plane of the detection objective. Therefore, we tilted the illumination  
 828 light sheet about the light sheet plane's normal axis. After implementing light-sheet  
 829 tilting, the polarization samples need to satisfy the looser constraint

$$\hat{\mathbf{p}}_{jv} \cdot \mathbf{R}_v \mathbf{R}_{\hat{\mathbf{d}}_A}(\phi) \hat{\mathbf{d}}_B = 0, \quad (\text{S92})$$

830 where  $\mathbf{R}_{\hat{\mathbf{d}}_A}(\phi)$  denotes a rotation about the  $\hat{\mathbf{d}}_A$  axis by angle  $\phi$  with entries

$$\mathbf{R}_{\hat{\mathbf{d}}_A}(\phi) = \begin{bmatrix} \cos \phi & -\sin \phi & 0 \\ \sin \phi & \cos \phi & 0 \\ 0 & 0 & 1 \end{bmatrix}. \quad (\text{S93})$$

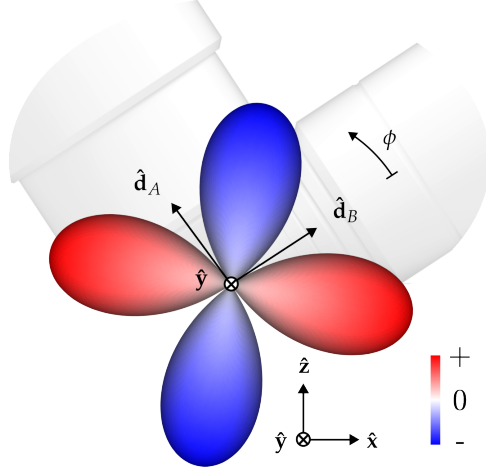

**Fig. S12 Non-tilting design null function.** Without light-sheet tilting, the imaging system has the angular null function depicted here. The null function is described mathematically as  $f^{(\text{null})}(\hat{\mathbf{s}}_o) = \sin^2 \theta \cos \phi \sin \phi$  where  $\theta$  (not shown) is measured from the  $\hat{\mathbf{y}}$  axis and  $\phi$  is measured from the  $\hat{\mathbf{d}}_B$  to the  $\hat{\mathbf{d}}_A$  axis in the  $\hat{\mathbf{d}}_A - \hat{\mathbf{d}}_B$  plane. The null function along each direction is drawn with radius proportional to  $|f^{(\text{null})}(\hat{\mathbf{s}}_o)|$  with negative values colored blue and positive values colored red.

831 We implemented practical tilt angles that satisfied  $|\phi| \lesssim 10^\circ$ , a limit set by aberrations,  
 832 which allows us to eliminate the null function. Notice that our tilting scheme does  
 833 not change the spatial illumination pattern when light-sheet broadening is negligible,  
 834 so all of the models we developed in **Supplement 6** still apply to the augmented  
 835 instrument.

836 Purely spatial transfer functions have null functions that correspond to zeros in  
 837 the transfer function. This might suggest that we look for zeros in the spatio-angular  
 838 transfer function to find null functions, but unfortunately the absence of zeros in the  
 839 spatio-angular transfer function does not always indicate an absence of null functions.  
 840 The coefficients of the spherical harmonics change when we choose different spherical  
 841 coordinate systems (see **Supplement 5.6** to see how the Wigner-D matrices help us  
 842 find these coefficients under rotations), so null functions will be linear combinations  
 843 of the spherical harmonics in most coordinate systems. This is the case in this work  
 844 where we found no zeros in the transfer function, but still found a null function.

845 We found the null function in **Equation S91** by examining the singular value  
 846 decomposition of our spatio-angular transfer function  $\mathbf{H}_{j\nu, \ell m}(\mathbf{v})$ , where  $j\nu$  indexes the  
 847 rows and  $\ell m$  indexes the columns. Every null function has a corresponding zero among  
 848 the singular values, and we first identified the null function by noticing that we always  
 849 had zero in our non-tilting singular spectra. In other words, we found that without  
 850 tilting our spatio-angular transfer functions were at most rank 5, while with tilting we  
 851 could find spatio-angular transfer functions that were rank 6.

### 852 8.3 Optimizing polarization-tilt samples

853 Finally, we need to choose a set of six samples  $\hat{\mathbf{p}}_{j\nu} \in (\mathbb{S}^2)^6$  subject to the constraint  
 854 in **Equation S92**. We chose samples that optimized our ability to recover all six

855  $\ell = 0$  and  $\ell = 2$  spherical harmonic coefficient for large spatial objects. We start by  
 856 calculating the entries of the spatio-angular transfer function matrix at  $\mathbf{v} = \mathbf{0}$  for a  
 857 specific choice of polarization-tilt samples

$$(\mathcal{H}_{\hat{\mathbf{p}}_{j\nu}})_{j\nu, \ell m} = H_{j\nu, \ell m}(\mathbf{0}). \quad (\text{S94})$$

858 This  $6 \times 15$  matrix depends on our choice of illumination polarizations  $\hat{\mathbf{p}}_{j\nu}$  via the  
 859 angular excitation transfer function, see **Equation S68**. We are only interested in  
 860 recovering the  $\ell = 0$  and  $\ell = 2$  spherical harmonic coefficients, so we project this  
 861 matrix onto that subspace by multiplying with  $\mathcal{I}_{15 \times 6}$ , a  $15 \times 6$  matrix of zeros with  
 862 ones along the upper-left diagonal. Finally, we optimize the condition number of this  
 863  $6 \times 6$  matrix by solving

$$\operatorname{argmax}_{\hat{\mathbf{p}}_{j\nu}} \kappa(\mathcal{H}_{\hat{\mathbf{p}}_{j\nu}} \mathcal{I}_{15 \times 6}), \quad (\text{S95})$$

864 where  $\kappa(\mathcal{H})$  is the condition number of  $\mathcal{H}$ . Optimizing the condition number of this  
 865 matrix leads to designs where changing each of the input parameters results in a  
 866 large and independent change of the measured data, which makes the inverse problem  
 867 maximally invertible and least susceptible to corruption by noise.

868 We found an approximate solution of **Equation S95** by discretizing the tilt angle  
 869 into three choices  $\mathbf{t} \in \{-1, 0, +1\}$ , discretizing the polarizer angle into six choices  $p \in$   
 870  $\{0, 45^\circ, 60^\circ, 90^\circ, 120^\circ, 135^\circ\}$ , then performing a brute-force search across this space of  
 871 possibilities. Each objective function evaluation required us to compute the condition  
 872 number of a  $6 \times 6$  matrix required  $\sim 2$  ms on a single-core machine. With these choices,  
 873 a brute-force search was feasible because  $\binom{36}{6} \approx 2 \times 10^6$  objective function evaluations  
 874 required about 2 hours.

875 Our optimized sample with and without light-sheet tilting are shown in **Figure**  
 876 **S13**. Without tilting, the optimal samples use equally spaced polarization samples  
 877 with three samples from each illumination direction, and we named this rank-5 scheme  
 878 **Six no tilt**. With tilting, the optimal samples are asymmetric samples from each  
 879 illumination direction, and we named this rank-6 scheme **Six with tilt**.

880 We also acquired datasets with all possible tilt and polarization settings, a rank-6  
 881 scheme we called **All**. See **Table S1** for a summary of our excitation sampling schemes.

## 882 9 Movies

883 **Movie M1. GUV fly around.** A spatio-angular reconstruction of a  $\sim 6 \mu\text{m}$ -  
 884 diameter GUV labelled with FM1-43 with (a) ODFs and (b) peak cylinders separated  
 885 by 390 nm, and (c) a 3D density MIP. As the movie progresses the camera's viewing  
 886 axis rotates around the object.

887  
 888 **Movie M2. GUV peak slices.** A peak-cylinder reconstruction of a  $\sim 6 \mu\text{m}$ -  
 889 diameter GUV labelled with FM1-43 shown (a) in overview with peak cylinders  
 890 separated by 390 nm, and (b) a single-slice view where the slice is marked with a grey  
 891 square in both (a) and (b) and peak cylinders separated by 260 nm. As the movies

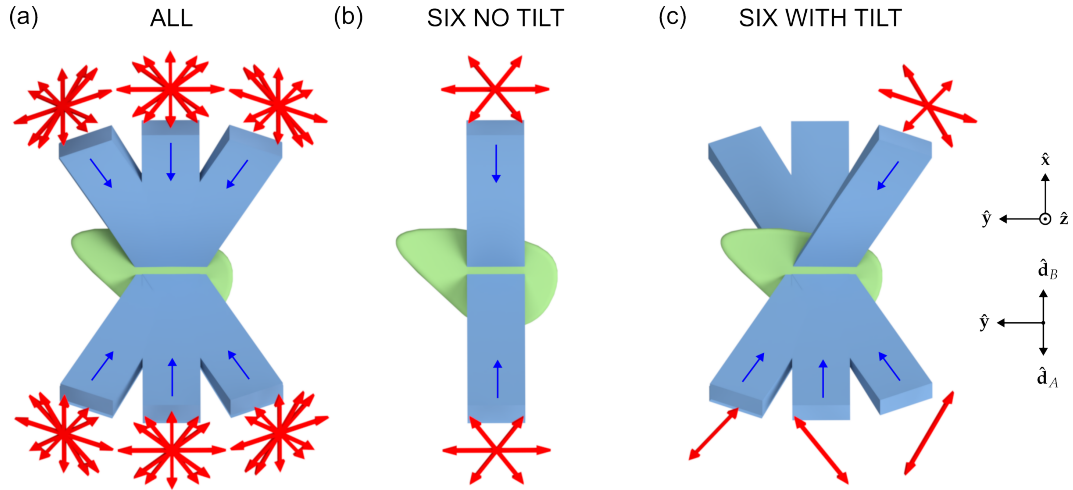

**Fig. S13 Excitation sampling schemes.** These top-down views of tilted illumination light sheets (light-blue rectangles propagating along the dark-blue arrows) and illumination polarization orientations (red arrows) summarize our excitation sampling schemes. Each red arrow has a transverse orientation, tilt, and view and corresponds to a single illumination sample. (a) We started with a complete set of 36 tilt illumination settings then searched from among the six-sample subsets that would optimize the condition number of the imaging system. When we restricted ourselves to samples without tilt, we found the **Six no tilt** scheme (b) three equally spaced polarization orientations for each illumination axis. When we allowed tilting, we found the **Six with tilt** scheme (c) which uses an view-asymmetric combination of polarization and tilt to maximize the condition number.

892 progresses the highlighted slice sweeps through the object in steps of 130 nm.

893

894 **Movie M3. Xylem fly around.** A spatio-angular reconstruction of a xylem cell  
 895 with its cellulose labelled by fast scarlet with (a) ODFs and (b) peak cylinders sep-  
 896 arated by  $1.3 \mu\text{m}$ , and (c) a 3D density MIP. As the movie progresses the camera's  
 897 viewing axis rotates around the object.

898

899 **Movie M4. Xylem peak slices.** A peak-cylinder reconstruction of xylem cell with  
 900 its cellulose labelled by fast scarlet shown (a) in overview with peak cylinders sep-  
 901 arated by  $1.3 \mu\text{m}$ , and (b) a single-slice view where the slice is marked with a grey  
 902 square in both (a) and (b) and peak cylinders separated by 520 nm. As the movies  
 903 progresses the highlighted slice sweeps through the object in steps of 520 nm.

904

905 **Movie M5. U2OS actin fly around.** A spatio-angular reconstruction of a U2OS  
 906 cell with its actin labelled by Alexa Fluor 488 phalloidin with (a) ODFs and (b) peak  
 907 cylinders separated by 260 nm, and (c) a 3D density MIP. As the movie progresses  
 908 the camera's viewing axis rotates around the object.

909

910 **Movie M6. U2OS actin peak slices.** A peak-cylinder reconstruction of a U2OS cell  
 911 with its actin labelled by Alexa Fluor 488 phalloidin shown (a) in overview with peak  
 912 cylinders separated by 260 nm, and (b) a single-slice view where the slice is marked

913 with a grey square in both (a) and (b) and peak cylinders separated by 130 nm. As the  
914 movies progresses the highlighted slice sweeps through the object in steps of 130 nm.

## 915 References

- 916 [1] Wu, Y., Kumar, A., Smith, C., Ardiel, E., Chandris, P., Christensen, R., Rey-  
917 Suarez, M. Ivan pand Guo, Vishwasrao, H.D., Chen, J., Tang, J., Upadhyaya, A.,  
918 La Rivière, P.J., Shroff, H.: Reflective imaging improves spatiotemporal resolution  
919 and collection efficiency in light sheet microscopy. *Nature Communications* **8**(1),  
920 1452 (2017) <https://doi.org/10.1038/s41467-017-01250-8>
- 921 [2] Shribak, M., Oldenbourg, R.: Techniques for fast and sensitive measurements of  
922 two-dimensional birefringence distributions. *Applied Optics* **42**(16), 3009–3017  
923 (2003) <https://doi.org/10.1364/AO.42.003009>
- 924 [3] Wu, Y., Wawrzusin, P., Senseney, J., Fischer, R.S., Christensen, R., Santella,  
925 A., York, A.G., Winter, P.W., Waterman, C.M., Bao, Z., Colón-Ramos, D.A.,  
926 McAuliffe, M., Shroff, H.: Spatially isotropic four-dimensional imaging with dual-  
927 view plane illumination microscopy. *Nature Biotechnology* **31**(11), 1032–1038  
928 (2013) <https://doi.org/10.1038/nbt.2713>
- 929 [4] Kumar, A., Wu, Y., Christensen, R., Chandris, P., Gandler, W., McCreedy, E.,  
930 Bokinsky, A., Colón-Ramos, D.A., Bao, Z., McAuliffe, M., Rondeau, G., Shroff,  
931 H.: Dual-view plane illumination microscopy for rapid and spatially isotropic  
932 imaging. *Nature Protocols* **9**, 2555–2573 (2014) [https://doi.org/10.1038/nprot.](https://doi.org/10.1038/nprot.2014.172)  
933 [2014.172](https://doi.org/10.1038/nprot.2014.172)
- 934 [5] Kumar, A., Christensen, R., Guo, M., Chandris, P., Duncan, W., Wu, Y., Santella,  
935 A., Moyle, M., Winter, P.W., Colón-Ramos, D., Bao, Z., Shroff, H.: Using stage-  
936 and slit-scanning to improve contrast and optical sectioning in dual-view inverted  
937 light sheet microscopy (diSPIM). *The Biological Bulletin* **231**(1), 26–39 (2016)  
938 <https://doi.org/10.1086/689589>
- 939 [6] Guo, M., Li, Y., Su, Y., Lambert, T., Nogare, D.D., Moyle, M.W., Duncan, L.H.,  
940 Ikegami, R., Santella, A., Rey-Suarez, I., Green, D., Beiriger, A., Chen, J., Vish-  
941 wasrao, H., Ganesan, S., Prince, V., Waters, J.C., Annunziata, C.M., Hafner,  
942 M., Mohler, W.A., Chitnis, A.B., Upadhyaya, A., Usdin, T.B., Bao, Z., Colón-  
943 Ramos, D., La Rivière, P., Liu, H., Wu, Y., Shroff, H.: Rapid image deconvolution  
944 and multiview fusion for optical microscopy. *Nature Biotechnology* **38**, 1337–1346  
945 (2020) <https://doi.org/10.1038/s41587-020-0560-x>
- 946 [7] Chandler, T., Shroff, H., Oldenbourg, R., La Rivière, P.J.: Spatio-angular fluo-  
947 rescence microscopy III. Constrained angular diffusion, polarized excitation, and  
948 high-NA imaging. *Journal of the Optical Society of America A* **37**(9), 1465–1479  
949 (2020) <https://doi.org/10.1364/JOSAA.389217>
- 950 [8] Novotny, L., Hecht, B.: Principles of Nano-optics. Cambridge University Press,



- 951 Cambridge, UK (2006)
- 952 [9] Lew, M.D., Backlund, M.P., Moerner, W.E.: Rotational mobility of sin-  
953 gular molecules affects localization accuracy in super-resolution fluorescence  
954 microscopy. *Nano Letters* **13**(9), 3967–3972 (2013) [https://doi.org/10.1021/  
955 nl304359p](https://doi.org/10.1021/nl304359p)
- 956 [10] Backer, A.S., Moerner, W.E.: Extending single-molecule microscopy using optical  
957 Fourier processing. *Journal of Physical Chemistry B* **118**(28), 8313–8329 (2014)  
958 <https://doi.org/10.1021/jp501778z>
- 959 [11] Stallinga, S.: Effect of rotational diffusion in an orientational potential well on the  
960 point spread function of electric dipole emitters. *Journal of the Optical Society  
961 of America A* **32**(2), 213–223 (2015) <https://doi.org/10.1364/JOSAA.32.000213>
- 962 [12] Homeier, H.H.H., Steinborn, E.O.: Some properties of the coupling coefficients  
963 of real spherical harmonics and their relation to Gaunt coefficients. *Journal of  
964 Molecular Structure: THEOCHEM* **368**, 31–37 (1996) [https://doi.org/10.1016/  
965 S0166-1280\(96\)90531-X](https://doi.org/10.1016/S0166-1280(96)90531-X)
- 966 [13] Kautz, J., Sloan, P.-P., Snyder, J.: Fast, arbitrary BRDF shading for low-  
967 frequency lighting using spherical harmonics. In: *Proceedings of the 13th  
968 Eurographics Workshop on Rendering, EGRW '02*, pp. 291–296. Eurographics  
969 Association, Aire-la-Ville, Switzerland, Switzerland (2002)
- 970 [14] Pinchon, D., Hoggan, P.E.: Rotation matrices for real spherical harmonics: Gen-  
971 eral rotations of atomic orbitals in space-fixed axes. *Journal of Physics A:  
972 Mathematical and Theoretical* **40**(7), 1597–1610 (2007) [https://doi.org/10.1088/  
973 1751-8113/40/7/011](https://doi.org/10.1088/1751-8113/40/7/011)
- 974 [15] Barrett, H.H., Myers, K.J.: *Foundations of Image Science*. Wiley-Interscience,  
975 Hoboken, NJ (2004)
- 976 [16] González, Á.: Measurement of areas on a sphere using Fibonacci and latitude-  
977 longitude lattices. *Mathematical Geosciences* **42**(1), 49–64 (2010) [https://doi.  
978 org/10.1007/s11004-009-9257-x](https://doi.org/10.1007/s11004-009-9257-x)
- 979 [17] Marques, R., Bouville, C., Ribardière, M., Santos, L.P., Bouatouch, K.: Spherical  
980 Fibonacci point sets for illumination integrals. *Computer Graphics Forum* **32**(8),  
981 134–143 (2013) <https://doi.org/10.1111/cgf.12190>
- 982 [18] Pajevic, S., Pierpaoli, C.: Color schemes to represent the orientation of anisotropic  
983 tissues from diffusion tensor data: Application to white matter fiber tract mapping  
984 in the human brain. *Magnetic Resonance in Medicine* **42**(3), 526–540 (1999) [https:  
985 //doi.org/10.1002/\(SICI\)1522-2594\(199909\)42:3<526::AID-MRM15>3.0.CO;2-J](https://doi.org/10.1002/(SICI)1522-2594(199909)42:3<526::AID-MRM15>3.0.CO;2-J)
- 986 [19] Demiralp, Ç., Hughes, J.F., Laidlaw, D.H.: Coloring 3D line fields using Boy’s real

- 987 projective plane immersion. *IEEE Transactions on Visualization and Computer*  
988 *Graphics* **15**(6), 1457–1464 (2009) <https://doi.org/10.1109/TVCG.2009.125>
- 989 [20] Tuch, D.S.: Q-ball imaging. *Magnetic Resonance in Medicine* **52**(6), 1358–1372  
990 (2004) <https://doi.org/10.1002/mrm.20279>
- 991 [21] Cheng, J., Basser, P.J.: Director field analysis (DFA): Exploring local white mat-  
992 ter geometric structure in diffusion MRI. *Medical Image Analysis* **43**, 112–128  
993 (2018) <https://doi.org/10.1016/j.media.2017.10.003>
- 994 [22] Eder, G.: Frege on intuition and objecthood in projective geometry. *Synthese*  
995 **199**(3), 6523–6561 (2021) <https://doi.org/10.1007/s11229-021-03080-0>
- 996 [23] Harris, C.R., Millman, K.J., Walt, S.J., Gommers, R., Virtanen, P., Cournapeau,  
997 D., Wieser, E., Taylor, J., Berg, S., Smith, N.J., Kern, R., Picus, M., Hoyer,  
998 S., Kerkwijk, M.H., Brett, M., Haldane, A., Río, J.F., Wiebe, M., Peterson,  
999 P., Gérard-Marchant, P., Sheppard, K., Reddy, T., Weckesser, W., Abbasi, H.,  
1000 Gohlke, C., Oliphant, T.E.: Array programming with NumPy. *Nature* **585**(7825),  
1001 357–362 (2020) <https://doi.org/10.1038/s41586-020-2649-2>
- 1002 [24] Åhlander, K.: Einstein summation for multidimensional arrays. *Computer and*  
1003 *Mathematics with Applications* **44**(8), 1007–1017 (2002) [https://doi.org/10.](https://doi.org/10.1016/S0898-1221(02)00210-9)  
1004 [1016/S0898-1221\(02\)00210-9](https://doi.org/10.1016/S0898-1221(02)00210-9)

| Scheme name          | $N$ samples | $(p, \mathbf{t}, \mathbf{v})$ samples                                                                                                                                                                 | Main-text figures |
|----------------------|-------------|-------------------------------------------------------------------------------------------------------------------------------------------------------------------------------------------------------|-------------------|
| <b>All</b>           | 42          | for $p$ in $\{0^\circ, 45^\circ, 60^\circ, 90^\circ, 120^\circ, 135^\circ, 0^\circ\}$ :<br>for $\mathbf{t}$ in $\{-1, 0, +1\}$ :<br>for $\mathbf{v}$ in $\{A, B\}$ :<br>$(p, \mathbf{t}, \mathbf{v})$ | 2                 |
| <b>Six no tilt</b>   | 6           | for $p$ in $[0^\circ, 60^\circ, 120^\circ]$ :<br>for $\mathbf{v}$ in $[A, B]$ :<br>$(p, 0, \mathbf{v})$                                                                                               | 3                 |
| <b>Six with tilt</b> | 6           | $(0^\circ, +1, A)$<br>$(60^\circ, 0, B)$<br>$(60^\circ, +1, A)$<br>$(120^\circ, +1, B)$<br>$(120^\circ, +1, A)$<br>$(120^\circ, -1, B)$                                                               | 3, 4, 5, 6        |

**Table S1** We acquired data under three different *excitation sampling schemes* named **All**, **Six no tilt**, and **Six with tilt**. Each sampling scheme consists of multiple samples, and each sample is described in the third column in  $(p, \mathbf{t}, \mathbf{v})$  notation.

| Symbol                                                                  | Member of                                                              | Description                                                     |
|-------------------------------------------------------------------------|------------------------------------------------------------------------|-----------------------------------------------------------------|
| $A(\boldsymbol{\tau}, \text{NA})$                                       | $\mathbb{R}$                                                           | amplitude pupil function                                        |
| $A, B$                                                                  | -                                                                      | view labels                                                     |
| $\beta$                                                                 | $\mathbb{R}$                                                           | thermodynamic beta = $1/k_b T$                                  |
| $\beta_{in}, \mathbf{b}_{nn'}, \gamma_{in}$                             | $\mathbb{R}$                                                           | intermediate electric-field representations                     |
| $\hat{\mathbf{d}}_A, \hat{\mathbf{y}}, \hat{\mathbf{d}}_B$              | $\mathbb{R}^3$                                                         | unit vectors aligned with detection objectives                  |
| $\mathcal{D}_v$                                                         | operator                                                               | Smoluchowski operator                                           |
| $\nabla$                                                                | operator                                                               | gradient                                                        |
| $\mathbf{D}$                                                            | operator                                                               | generalized diffusion tensor                                    |
| $\Delta_{mm'}^\ell$                                                     | $\mathbb{R}$                                                           | real Wigner D-matrix                                            |
| $f_{\text{gr}}^{(\text{gr})}(\mathbf{r}_o, \hat{\mathbf{s}}_o, t)$      | $\mathbb{L}_2(\mathbb{R}^3 \times \mathbb{S}^2 \times \mathbb{R})$     | ground state spatio-angular density                             |
| $f^{(\text{ex})}(\mathbf{r}_o, \hat{\mathbf{s}}_o, t)$                  | $\mathbb{L}_2(\mathbb{R}^3 \times \mathbb{S}^2 \times \mathbb{R})$     | excited state spatio-angular density                            |
| $f^{(\text{em})}(\mathbf{r}_o, \hat{\mathbf{s}}_o)$                     | $\mathbb{L}_2(\mathbb{R}^3 \times \mathbb{S}^2)$                       | spatio-angular emission density                                 |
| $f(\mathbf{r}_o, \hat{\mathbf{s}}_o)$                                   | $\mathbb{L}_2(\mathbb{R}^3 \times \mathbb{S}^2)$                       | spatio-angular Boltzmann density                                |
| $\mathbf{F}_{\ell m}(\mathbf{v})$                                       | $\mathbb{L}_2(\mathbb{R}^3 \times \mathbb{S}^2)$                       | spatio-angular Boltzmann spectrum                               |
| $g_{jv}(\mathbf{r}_d)$                                                  | $\mathbb{L}_2(\mathbb{R}^3)^N$                                         | irradiance measurements                                         |
| $G_{jv}(\mathbf{v})$                                                    | $\mathbb{L}_2(\mathbb{R}^3)^N$                                         | irradiance spectrum                                             |
| $g_{\ell' \ell''}^{mm' m''}$                                            | $\mathbb{R}$                                                           | Gaunt coefficient                                               |
| $h_{jv}^{(\text{exc})}(\mathbf{r}_d, \mathbf{r}_o, \hat{\mathbf{s}}_o)$ | $\mathbb{L}_2(\mathbb{R}^3 \times \mathbb{R}^3 \times \mathbb{S}^2)^N$ | shift-variant spatio-angular excitation point-response function |
| $h_{\mathbf{v}}^{(\text{exc}, \text{sp})}(\mathbf{r}_d, \mathbf{r}_o)$  | $\mathbb{L}_2(\mathbb{R}^3 \times \mathbb{R}^3)^N$                     | shift-variant spatial excitation point-response function        |
| $h_{jv}^{(\text{exc}, \text{ang})}(\hat{\mathbf{s}}_o)$                 | $\mathbb{L}_2(\mathbb{S}^2)^N$                                         | angular excitation point-response function                      |
| $h_{jv}^{(\text{det})}(\mathbf{r}_d, \mathbf{r}_o, \hat{\mathbf{s}}_o)$ | $\mathbb{L}_2(\mathbb{R}^3 \times \mathbb{R}^3 \times \mathbb{S}^2)^N$ | shift-variant spatio-angular detection point-response function  |
| $h_{jv}(\mathbf{r}_d, \mathbf{r}_o, \hat{\mathbf{s}}_o)$                | $\mathbb{L}_2(\mathbb{R}^3 \times \mathbb{R}^3 \times \mathbb{S}^2)^N$ | shift-variant spatio-angular point-response function            |
| $h_{jv}(\mathbf{r}, \hat{\mathbf{s}}_o)$                                | $\mathbb{L}_2(\mathbb{R}^3 \times \mathbb{S}^2)^N$                     | shift-invariant spatio-angular point-response function          |
| $\mathbf{H}_{jv, \ell m}(\mathbf{v})$                                   | $\mathbb{L}_2(\mathbb{R}^3)^N$                                         | spatio-angular transfer function                                |
| $i$                                                                     | $\mathbb{Z}$                                                           | imaginary unit, electric field component index                  |
| $j$                                                                     | $[1, 2, \dots, N/2]$                                                   | polarization index, combines $p$ and $\mathbf{t}$               |
| $k$                                                                     | $[1, 2, \dots, R]$                                                     | singular value index                                            |
| $\kappa$                                                                | $\mathbb{R}$                                                           | transition rate                                                 |
| $\kappa^{(\text{d})}(\mathbf{r}_o, \hat{\mathbf{s}}_o)$                 | $\mathbb{L}^2(\mathbb{R}^2 \times \mathbb{S}^2)$                       | spatio-angular decay transition rate                            |
| $\lambda$                                                               | $\mathbb{R} > 0$                                                       | wavelength                                                      |
| $\ell$                                                                  | $[0, 1, 2, \dots]$                                                     | spherical-harmonic band index                                   |
| $m$                                                                     | $\mathbb{Z}$                                                           | spherical harmonic intra-band index $-\ell \leq m \leq \ell$    |
| $n_0$                                                                   | $\mathbb{R} > 0$                                                       | index of refraction of the medium                               |
| $n$                                                                     | $[0, 1, 2]$                                                            | dipole component index                                          |
| $\mathbf{n}$                                                            | $[1, \dots, N]$                                                        | index for spherical visualization directions                    |
| $\mathbf{N}$                                                            | $\mathbb{Z}$                                                           | number of spherical visualization directions                    |
| $\eta$                                                                  | $\mathbb{R}$                                                           | regularization parameter                                        |
| $p$                                                                     | $[0, \pi)$                                                             | transverse-polarization index                                   |
| $\hat{\mathbf{p}}_{jv}$                                                 | $(\mathbb{S}^2)^N$                                                     | polarization axis vectors                                       |
| $P_\ell(x)$                                                             | $\mathbb{L}_2([-1, 1])$                                                | Legendre polynomial                                             |
| $\Phi(\boldsymbol{\tau}, r^\perp)$                                      | $\mathbb{R}$                                                           | defocus-phase pupil function                                    |
| $\rho(\mathbf{r}_o)$                                                    | $\mathbb{L}_2(\mathbb{R}^3)$                                           | spatial labelling density                                       |
| $\mathbf{r}_o, \mathbf{r}_d$                                            | $\mathbb{R}^3$                                                         | 3D coordinate in object and data space                          |
| $r_v^\parallel$                                                         | $\mathbb{R}$                                                           | view-specific axial coordinate                                  |
| $R$                                                                     | $\mathbb{Z}^+$                                                         | rank                                                            |
| $\mathbf{R}_v$                                                          | $\mathbb{SO}(3)$                                                       | view-dependent rotation matrix                                  |
| $\mathbb{R}^N$                                                          | -                                                                      | $N$ D Euclidean space                                           |
| $\hat{\mathbf{s}}_o$                                                    | $\mathbb{S}^2$                                                         | orientation in object space                                     |
| $s_n$                                                                   | $\mathbb{R}$                                                           | component of $\hat{\mathbf{s}}_o$                               |
| $\mathbb{S}^2$                                                          | -                                                                      | 2D sphere                                                       |
| $t$                                                                     | $\mathbb{R}$                                                           | time                                                            |
| $\mathbf{t}$                                                            | $\{-1, 0, +1\}$                                                        | tilt labels                                                     |
| $U_{k, \ell m}(\mathbf{v})$                                             | $\mathbb{L}_2(\mathbb{R}^3 \times \mathbb{S}^2)$                       | object-space singular vector                                    |
| $V_{k, jv}(\mathbf{v})$                                                 | $\mathbb{L}_2(\mathbb{R}^3)^N$                                         | data-space singular vector                                      |
| $v(\mathbf{r}_o, \hat{\mathbf{s}}_o)$                                   | $\mathbb{L}_2(\mathbb{R}^3 \times \mathbb{S}^2)$                       | spatio-angular potential                                        |
| $\mathbf{v}$                                                            | $\{A, B\}$                                                             | view labels                                                     |
| $\mathbf{v}$                                                            | $\mathbb{L}_2(\mathbb{R}^3)$                                           | spatial-frequency coordinate                                    |
| $w_o, w_*, w$                                                           | $\mathbb{R}, i, 0$                                                     | beam widths                                                     |
| $\hat{\mathbf{x}}, \hat{\mathbf{y}}, \hat{\mathbf{z}}$                  | $\mathbb{S}^2$                                                         | unit vectors aligned with coverslip                             |
| $Y_{\ell m}(\hat{\mathbf{s}}_o)$                                        | $\mathbb{L}_2(\mathbb{S}^2)$                                           | real spherical harmonic function                                |
| $\mathbb{Z}, \mathbb{Z}^+$                                              | -                                                                      | integers, positive integers                                     |

**Table S2** Table of symbols.

| Pattern                 | Examples                                                                                                           | Description                                             |
|-------------------------|--------------------------------------------------------------------------------------------------------------------|---------------------------------------------------------|
| Blackboard bold         | $\mathbb{R}^3, \mathbb{S}^2, \mathbb{L}_2$                                                                         | mathematical sets                                       |
| Boldface Roman          | $\mathbf{r}, \mathbf{s}, \boldsymbol{\tau}, \boldsymbol{\nu}$                                                      | 2D vectors                                              |
| Boldface Fraktur        | $\mathfrak{r}, \boldsymbol{\nu}$                                                                                   | 3D vectors                                              |
| Hat on boldface         | $\hat{\mathbf{s}}_o, \hat{\mathbf{d}}_A, \hat{\mathbf{d}}_B, \hat{\mathbf{x}}, \hat{\mathbf{y}}, \hat{\mathbf{z}}$ | unit vector                                             |
| Hat on non-boldface     | $\hat{F}$                                                                                                          | estimate                                                |
| Letter f                | $f, F, \mathbf{F}$                                                                                                 | object properties to be estimated                       |
| Letter g                | $g, G$                                                                                                             | measurements                                            |
| Letter h                | $h, H, \mathbf{H}$                                                                                                 | instrument-response functions                           |
| Subscript $d$           | $\mathbf{r}_d$                                                                                                     | detector coordinate                                     |
| Subscript $o$           | $\mathbf{r}_o, \hat{\mathbf{s}}_o$                                                                                 | object-related coordinate                               |
| Superscript $\perp$     | $\mathbf{r}^\perp$                                                                                                 | transverse coordinate perpendicular to the optical axis |
| Superscript $\parallel$ | $r^\parallel$                                                                                                      | axial coordinate parallel to the optical axis           |

**Table S3** Notation patterns, subscripts, and superscripts.

| Steps                                        | Symbols                                                                                                          | numpy pseudocode                                                     |
|----------------------------------------------|------------------------------------------------------------------------------------------------------------------|----------------------------------------------------------------------|
| <i>Precalculations</i>                       |                                                                                                                  |                                                                      |
| Calculate the model in a compact basis       | $\mathbf{H}_{j,\ell m}(\mathbf{v})$                                                                              | <code>H.shape -&gt; (100, 100, 100, 15, 6)</code>                    |
| Calculate the SVD                            |                                                                                                                  | <code>u, s, v = np.linalg.svd(H, full_matrices=False)</code>         |
| ... object space singular functions          | $U_{k,\ell m}(\mathbf{v})$                                                                                       | <code>u.shape -&gt; (100, 100, 100, 15, 6)</code>                    |
| ... singular values                          | $\sqrt{\mu_k(\mathbf{v})}$                                                                                       | <code>s.shape -&gt; (100, 100, 100, 6)</code>                        |
| ... data space singular functions            | $V_{k,jv}(\mathbf{v})$                                                                                           | <code>v.shape -&gt; (100, 100, 100, 6, 6)</code>                     |
| <i>Reconstruction</i>                        |                                                                                                                  |                                                                      |
| Collect data                                 | $g_{jv}(\mathbf{r}_d)$                                                                                           | <code>g.shape -&gt; (100, 100, 100, 6)</code>                        |
| DFT                                          | $G_{jv}(\mathbf{v})$                                                                                             | <code>G = np.fft.fftn(g, axes=(0,1,2))</code>                        |
| Choose $\eta$ and regularize singular values | $\sigma_k(\mathbf{v}) = \frac{\sqrt{\mu_k(\mathbf{v})}}{\mu_k(\mathbf{v}) + \eta}$                               | <code>sr = s/(s**2 + eta)</code>                                     |
| Estimate $\hat{F}_{\ell m}^\eta(\mathbf{v})$ | $\sum_k \sigma_k(\mathbf{v}) U_{k,\ell m}(\mathbf{v}) \dots$<br>$\sum_j V_{k,jv}(\mathbf{v}) G_{jv}(\mathbf{v})$ | <code>F = np.einsum('xyk,xysk,xyjk,xyj-&gt;xys', sr, u, v, G)</code> |
| Inverse DFT then save                        | $\hat{F}_{\ell m}^\eta(\mathbf{r}_o)$                                                                            | <code>Fr = np.fft.ifftn(F, axes=(0,1,2))</code>                      |
| <i>Visualization</i>                         |                                                                                                                  |                                                                      |
| Choose spherical points                      | $\{\hat{\mathbf{s}}_{o,n}\}$                                                                                     | <code>sp.shape -&gt; (500, 3)</code>                                 |
| Calculate SH to ODF coefficients             | $Y_{\ell m}(\hat{\mathbf{s}}_{o,n})$                                                                             | <code>Y[n,s] = spharm(s2l(s), s2m(s), sp[n,:])</code>                |
| Choose mask (e.g. density > 0.5)             | $\{\mathbf{r}_{o,n}\}$                                                                                           | <code>mask = Fr[:, :, 0] &gt; 0.5</code>                             |
| Orientation distribution functions (ODFs)    | $\hat{f}^\eta(\mathbf{r}_{o,n})$                                                                                 | <code>ODF = np.einsum('ns,is-&gt;ni', Y, Fr[mask])</code>            |
| Peak directions                              | $\hat{\mathbf{s}}^{\eta, (pk)}(\mathbf{r}_{o,n})$                                                                | <code>np.amax(ODF, axis=0)</code>                                    |
| Density                                      | $\hat{\rho}^\eta(\mathbf{r}_o)$                                                                                  | <code>Fr[:, :, 0]</code>                                             |
| Generalized fractional anisotropy            | $G\hat{F}A^\eta(\mathbf{r}_o)$                                                                                   | <code>np.sqrt(1 - (Fr[:, :, 0]**2 / np.sum(Fr**2, axis=-1)))</code>  |

**Table S4** Summary of reconstruction and visualization algorithms with pseudocode implementations.
